# Supplementary material for: Hybrid QM/QM simulations of photochemical reactions in the molecular crystal N-salicylidene-2-chloroaniline
Source: Royal Society of Chemistry journal article supplement (doi:10.1039/c3cp51263k), 2013-01-01

1 Hybrid QM/QM Simulations of Photochemical  
2 Reactions in the Molecular Crystal  
3 *N*-salicylidene-2-chloroaniline

4 Michał A. Kochman,<sup>a</sup> Andrzej Bil,<sup>b,c</sup> Carole A. Morrison<sup>a,\*</sup>

5 <sup>a</sup> *School of Chemistry and EaSTCHEM Research School, The University of*  
6 *Edinburgh, King's Buildings, West Mains Road, Edinburgh, EH9 3JJ, UK*

7 <sup>b</sup> *Institute of Physical Chemistry, University of Zürich, Winterthurerstrasse*  
8 *190, CH-8057 Zürich, Switzerland*

9 <sup>c</sup> *Faculty of Chemistry, University of Wrocław, F. Joliot-Curie 14, 50-383*  
10 *Wrocław, Poland*

11

12 *Celebrating 300 years of Chemistry at Edinburgh.*

13

14 \* *Corresponding author: C.Morrison@ed.ac.uk*

15

16 **1 Molecular Packing in the Photochromic**  
17 **Polymorph of SCA**

18 In order to further assess the crystal packing of SCA, we have carried  
19 out a Voronoi-Dirichlet tessellation<sup>1</sup> of the crystal structure using the  
20 computer program TOPOS 4.0.<sup>2</sup> This process assigns to each atom (which  
21 in this context is considered to be a point positioned at the nucleus) a  
22 Voronoi-Dirichlet polyhedron (VDP) that contains all points whose distance  
23 to that atom is not greater than the distance to any other atom. In this  
24 manner, space is partitioned completely and disjointly into VDPs associated  
25 with individual atoms. (The partitioning is not disjoint in the rigorous sense,  
26 because the surface of each polyhedron is shared with the neighbouring

27 polyhedra, but this fine point can be ignored here.) The VDP of an atom  
28 may be roughly interpreted as the region of space taken up by the atom  
29 and, by extension, the union of VPDs of atoms comprising a molecule may  
30 be regarded as the region of space belonging to that molecule. We must  
31 bear in mind, however, that although the Voronoi-Dirichlet tessellation  
32 provides a convenient means to analyze the molecular packing, the VDPs  
33 are purely geometric constructs that do not reflect the electronic structure  
34 of a crystal, and it would therefore be meaningless to use them to analyze  
35 system properties other than the spatial arrangement of atoms.

36

37 In Figure 1 we show two views of the union of atomic VDPs belonging  
38 to a single SCA molecule in the crystal lattice. It can be seen that the  
39 union of VDPs follows the shape of the molecule quite closely, consisting  
40 of two disk-like parts, which correspond to the two aromatic rings, joined  
41 at the edge. In particular, no significant bulge or protuberance is visible  
42 above or below the aromatic rings, indicating that the crystal structure  
43 contains no large voids on either side of the rings. This, in turn, suggests  
44 that a photoisomerisation mechanism involving a simple rotation around  
45 the C3-C4 bond is obstructed by intermolecular steric interactions, whereas  
46 the pedal-motion mechanism of Harada *et al.*, in which the two aromatic  
47 rings are less strongly displaced from their original positions, seems likely to  
48 be able to proceed with less steric hindrance.

49

50

Figure 1: Atomic VDPs of an SCA molecule in the crystal lattice. Above each view of the VDPs, the SCA molecule is displayed to scale and in the same orientation.

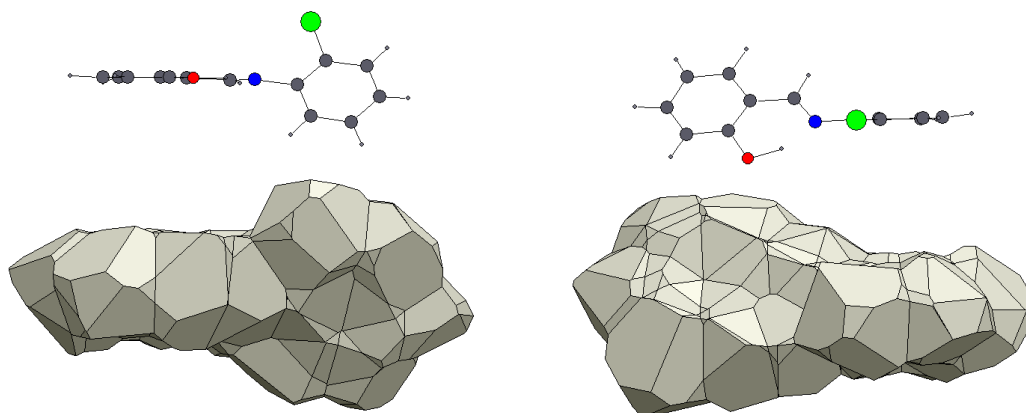

51 Note that in addition to the photochromic polymorph of SCA whose crystal  
52 structure is discussed above, a non-photochromic SCA polymorph has  
53 recently been reported<sup>3</sup> in which the molecules are planar and  $\pi$ -stacked. The  
54 density calculated from the crystal cell and contents of the non-photochromic  
55 polymorph at room temperature is slightly higher than that of the  
56 photochromic polymorph, at 1.405 g/cm<sup>3</sup> and 1.359 g/cm<sup>3</sup>, respectively.

## 57 **2 Construction of the $1 \times 1 \times 2$ Supercell** 58 **Containing a *Trans*-keto Molecule**

59 In the experimentally determined structure of the *trans*-keto tautomer  
60 of *N*-3,5-di-*tert*-butylsalicylidene-3-nitroaniline embedded in a lattice  
61 consisting predominantly of *cis*-enol molecules, the *trans*-keto molecule is  
62 positioned very similarly to the original *cis*-enol molecule.<sup>4</sup> Hence, in order to  
63 generate the starting geometry of the supercell containing a single *trans*-keto  
64 molecule, one molecule in the experimental crystal structure was converted  
65 from the *cis*-enol into the *trans*-keto form by manually moving the atoms H1,  
66 H2, C3 and N1 while preserving the position of the two aromatic rings. The  
67 structure obtained in this way was subsequently optimised at the periodic  
68 DFT level of theory (see Section 3.4.2 of the main body of the present

69 paper for a detailed description of the parameters of the DFT calculation).  
70 The default BFGS optimisation algorithm was applied, with the following  
71 convergence criteria: energy tolerance  $2.0 \times 10^{-5}$  eV/atom, maximum force  
72 tolerance  $5.0 \times 10^{-2}$  eV/Å, displacement tolerance  $1.0 \times 10^{-3}$  Å. The resulting  
73 optimised geometry of the supercell containing one *trans*-keto molecule and  
74 seven *cis*-enol molecules is shown in Figure 6(b) in the main body of the  
75 present paper.

## 76 References

- 77 [1] V. A. Blatov, *Cryst. Rev.*, 2004, **10**, 249.
- 78 [2] TOPOS website: <http://www.topos.ssu.samara.ru/>
- 79 [3] K. Johmoto, T. Ishida, A. Sekine, H. Uekusa, Y. Ohashi, *Acta Cryst.*,  
80 2012, **B68**, 297.
- 81 [4] J. Harada, H. Uekusa, Y. Ohashi, *J. Am. Chem. Soc.*, 1999, **121**,  
82 5809.

## Snapshots from Trajectory 1

$$t = 0 \text{ fs} \quad E(S_1) - E(S_0) = 3.636 \text{ eV}$$

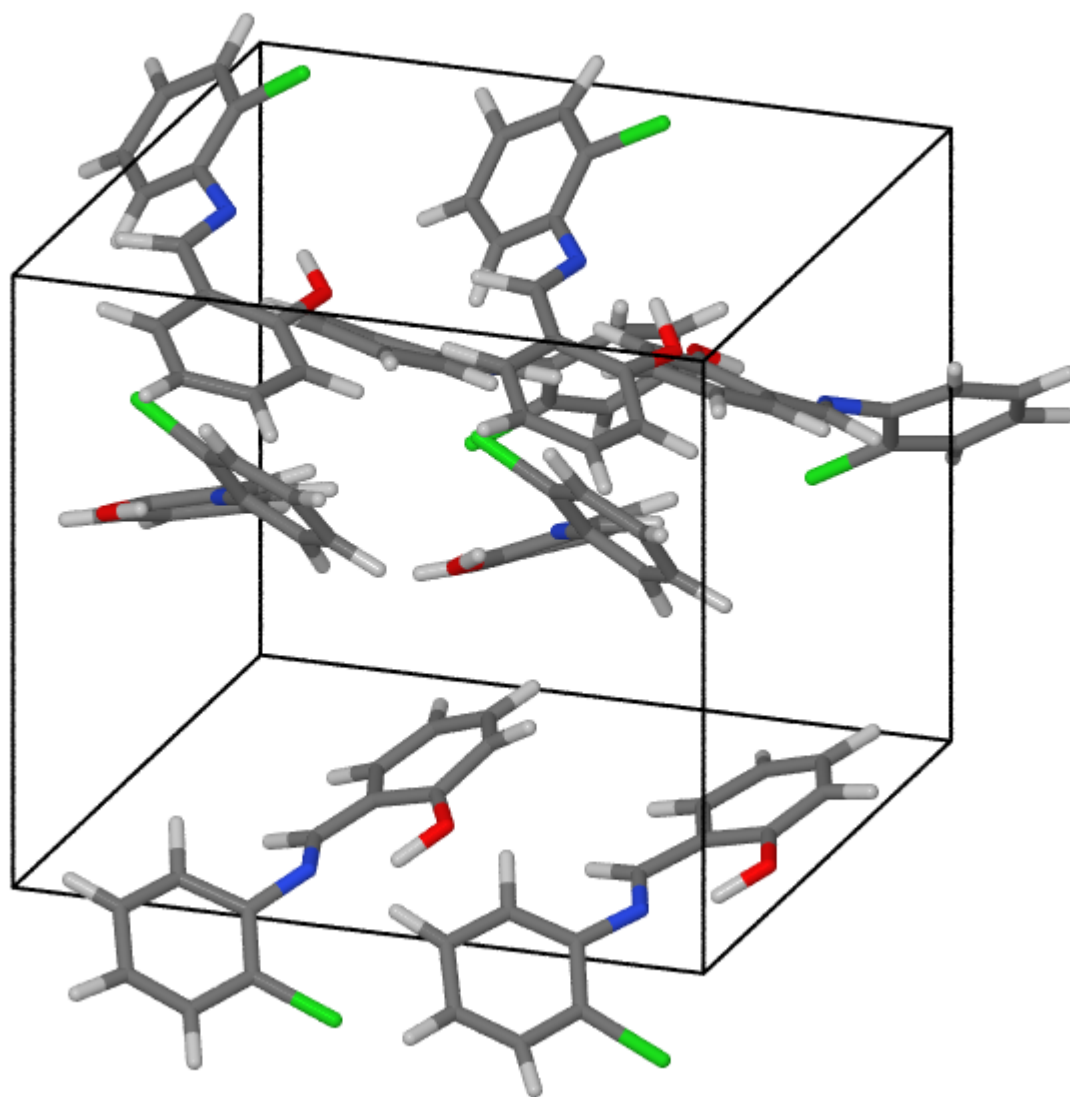

$$t = 5 \text{ fs} \quad E(S_1) - E(S_0) = 3.316 \text{ eV}$$

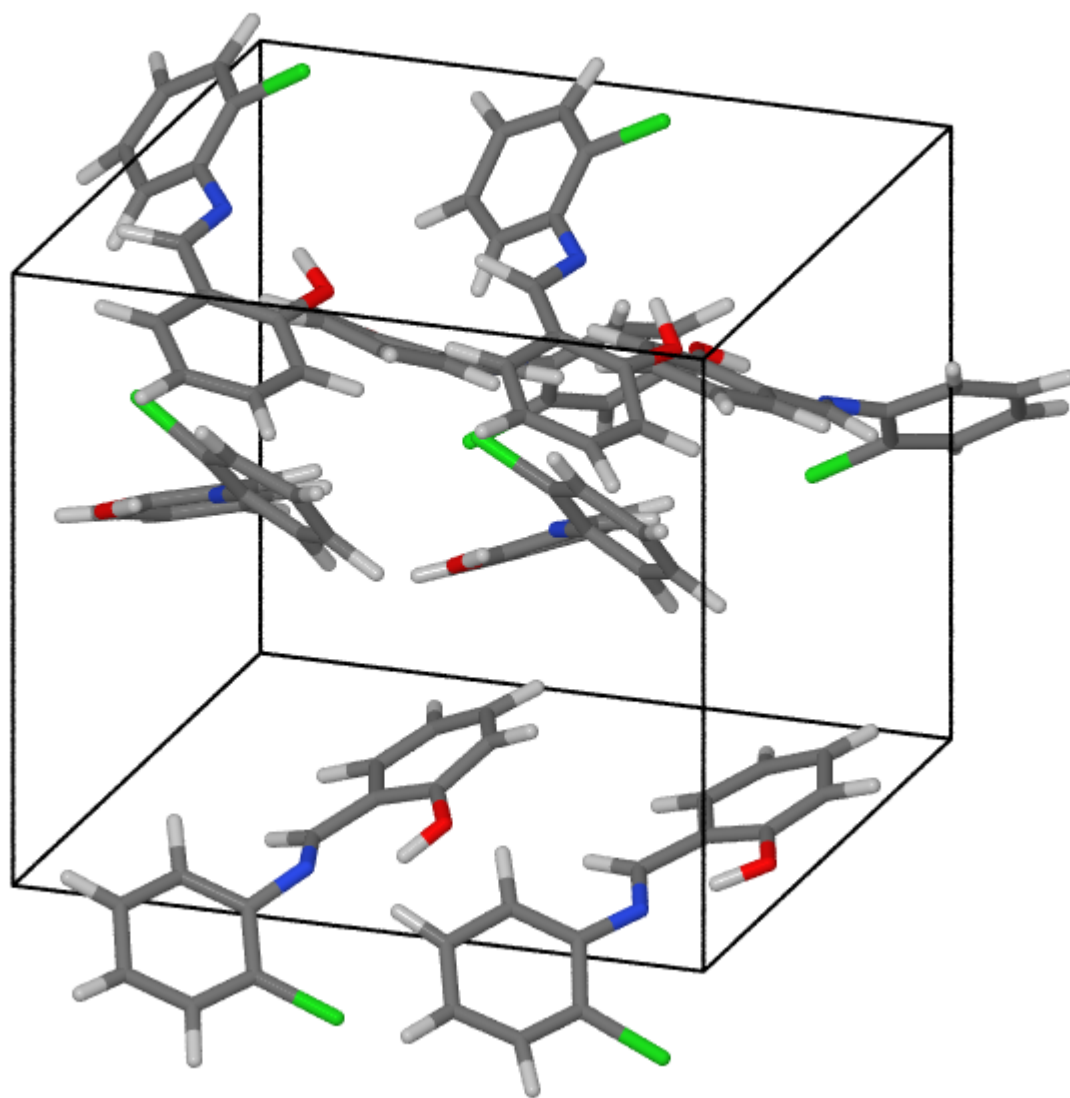

$$t = 10 \text{ fs} \quad E(S_1) - E(S_0) = 2.923 \text{ eV}$$

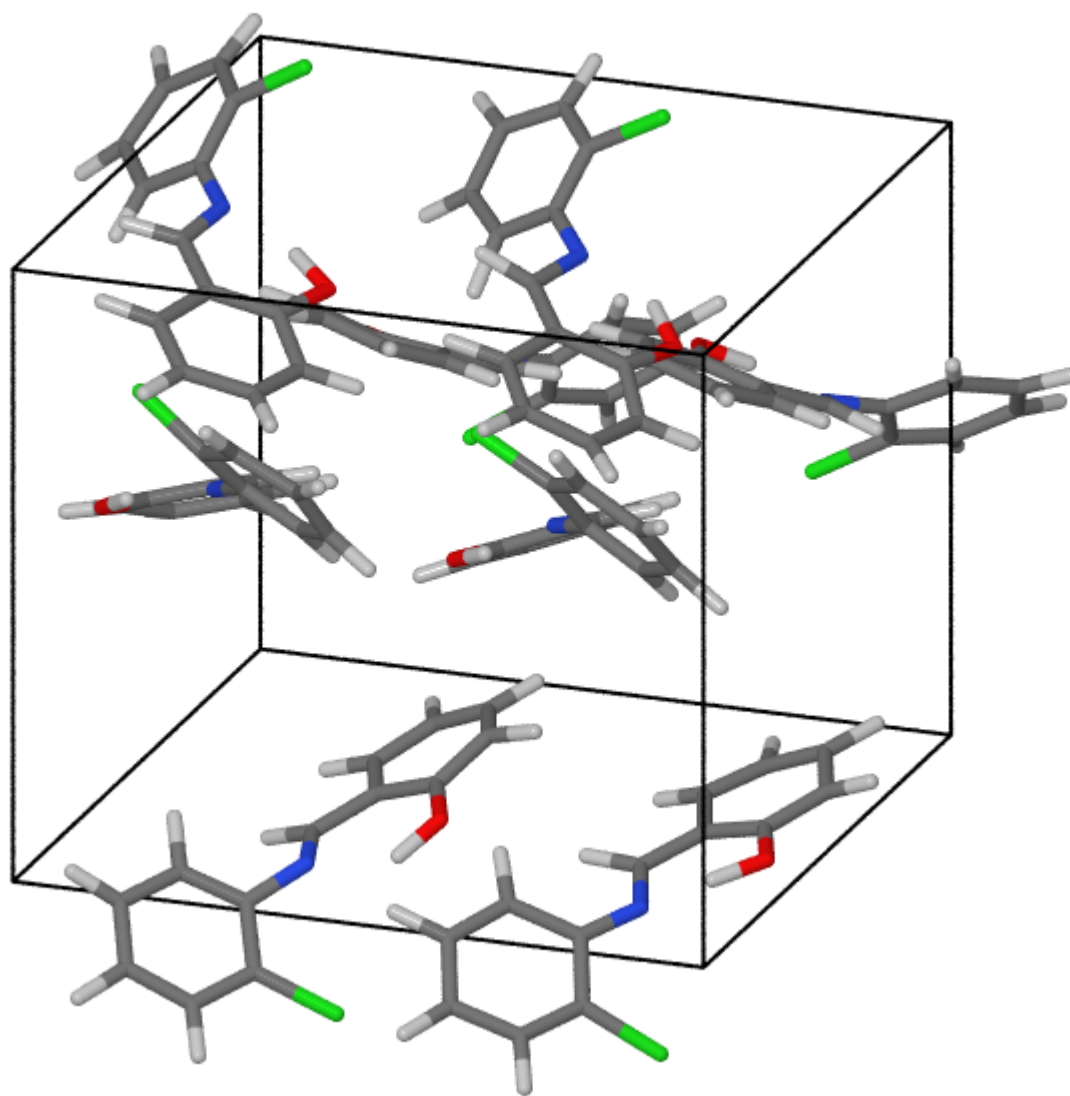

$$t = 15 \text{ fs} \quad E(S_1) - E(S_0) = 3.139 \text{ eV}$$

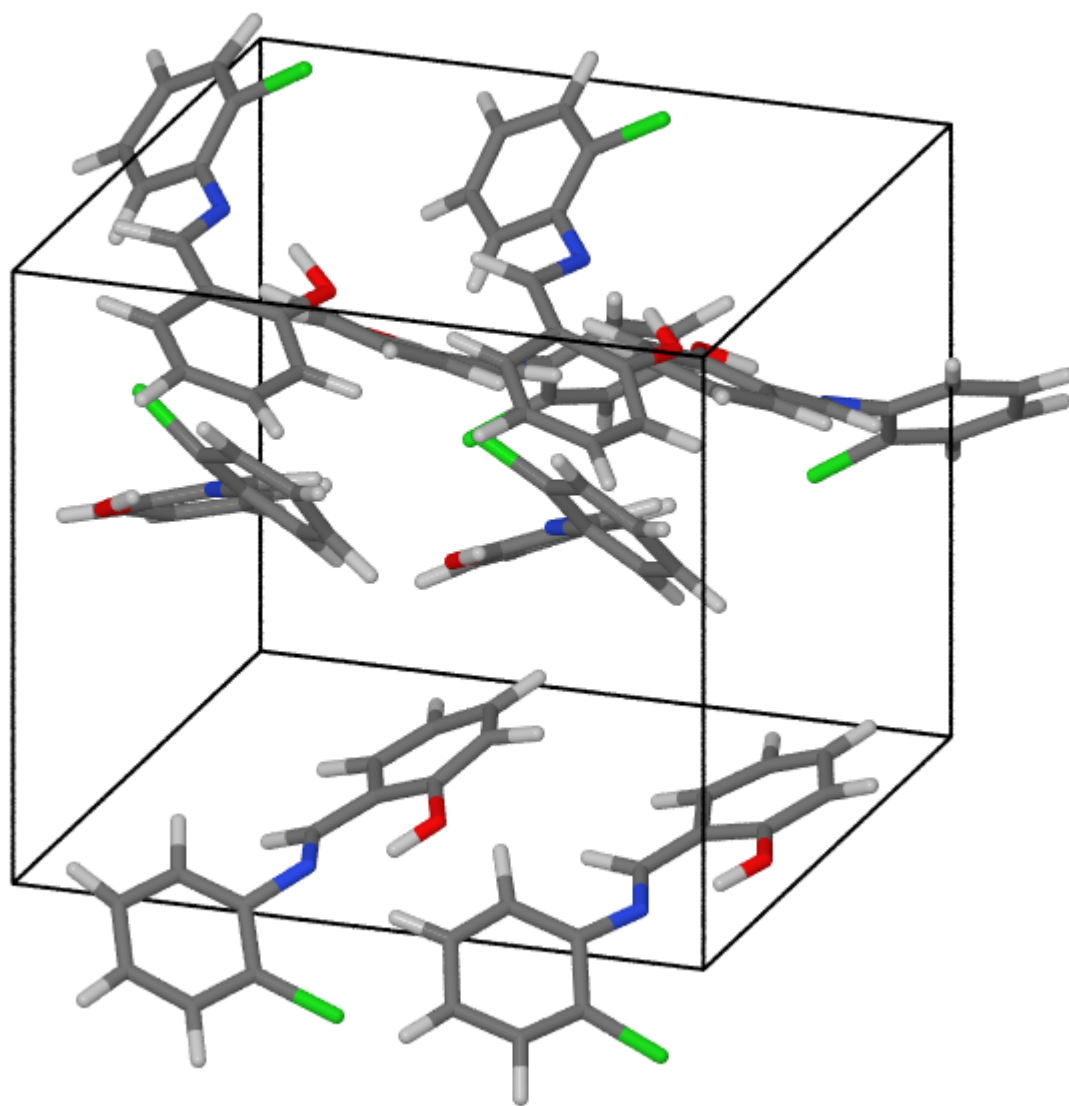



$$t = 20 \text{ fs} \quad E(S_1) - E(S_0) = 3.356 \text{ eV}$$

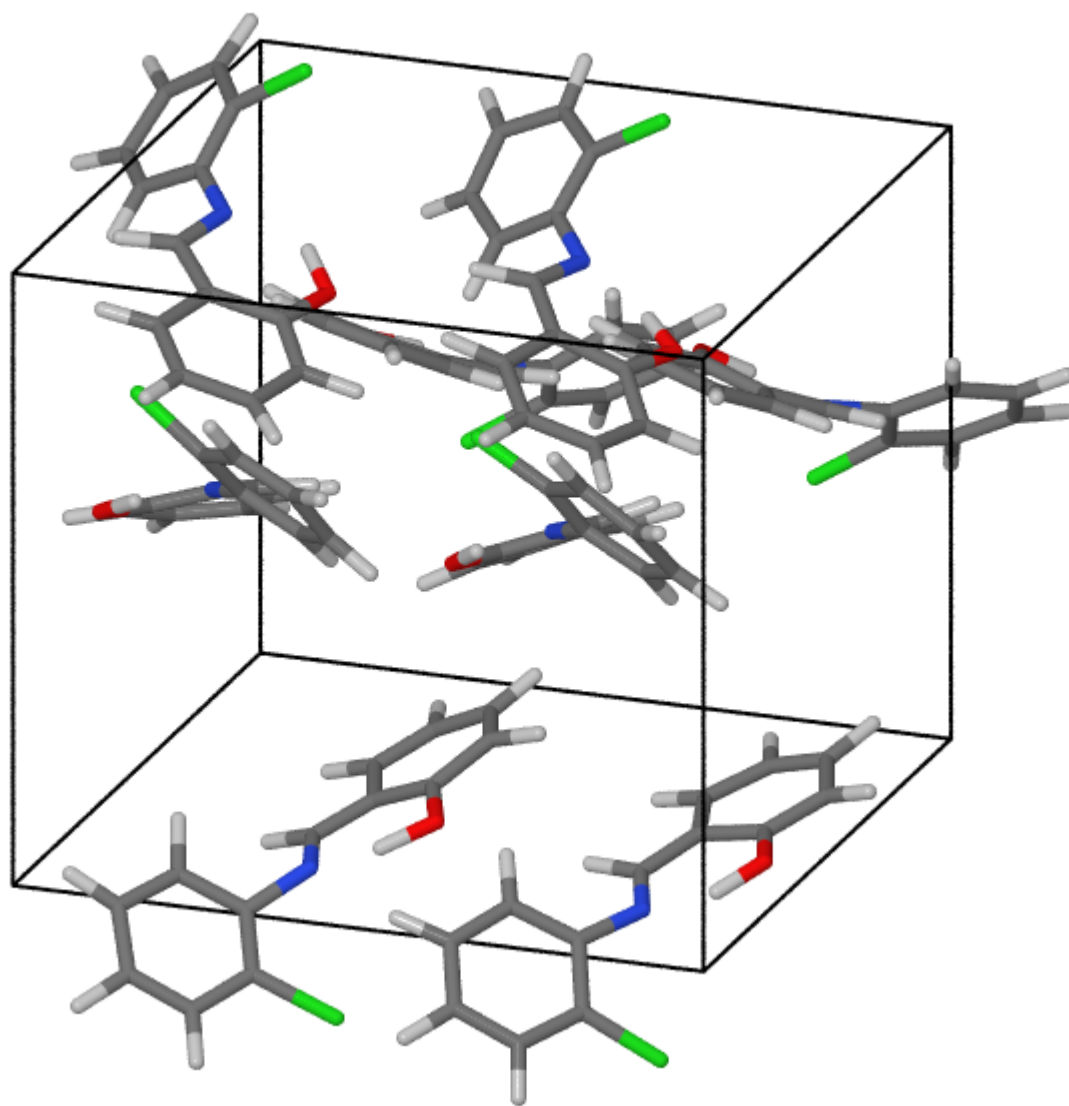

$$t = 25 \text{ fs} \quad E(S_1) - E(S_0) = 2.751 \text{ eV}$$

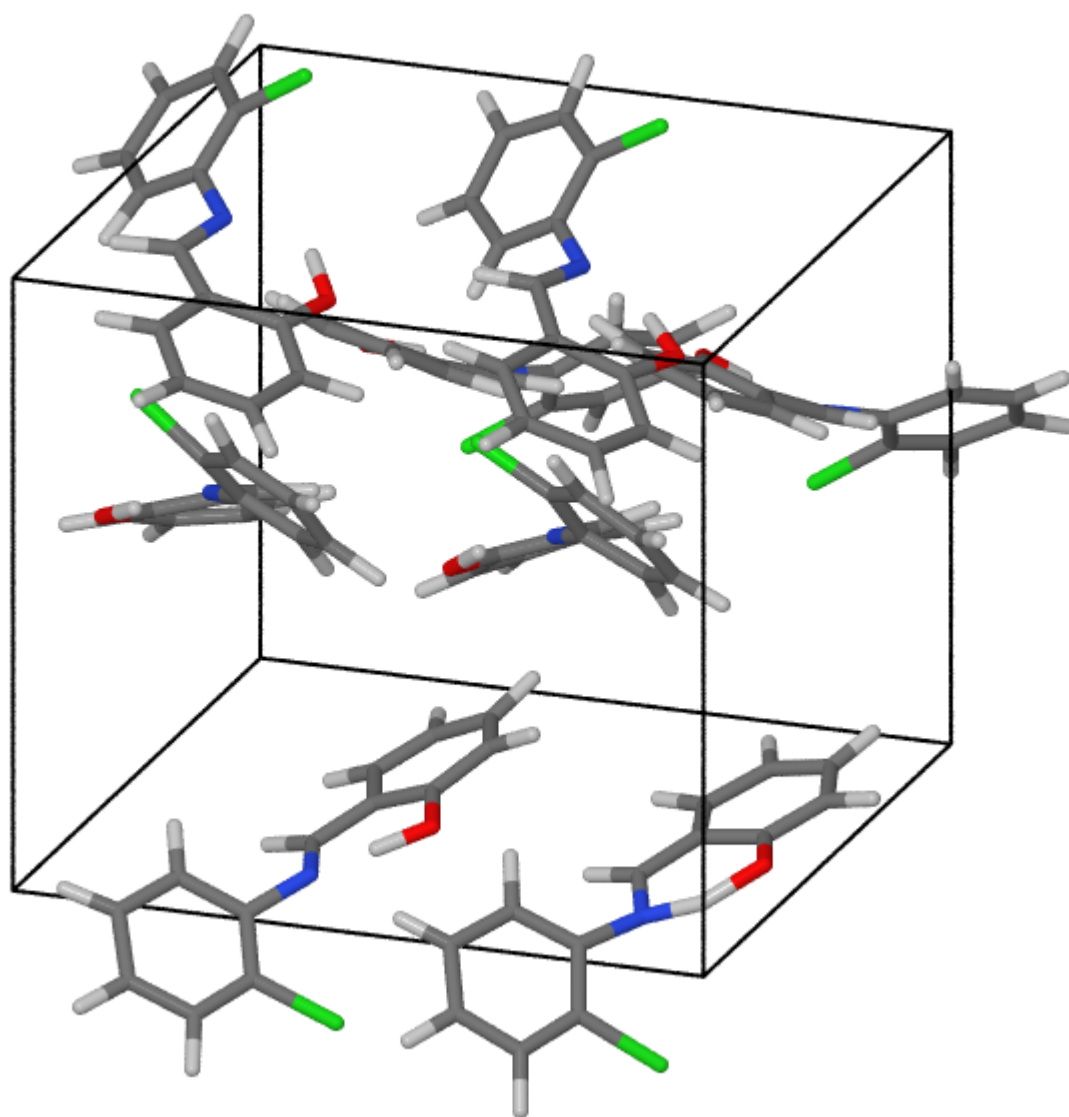

$$t = 30 \text{ fs} \quad E(S_1) - E(S_0) = 2.297 \text{ eV}$$

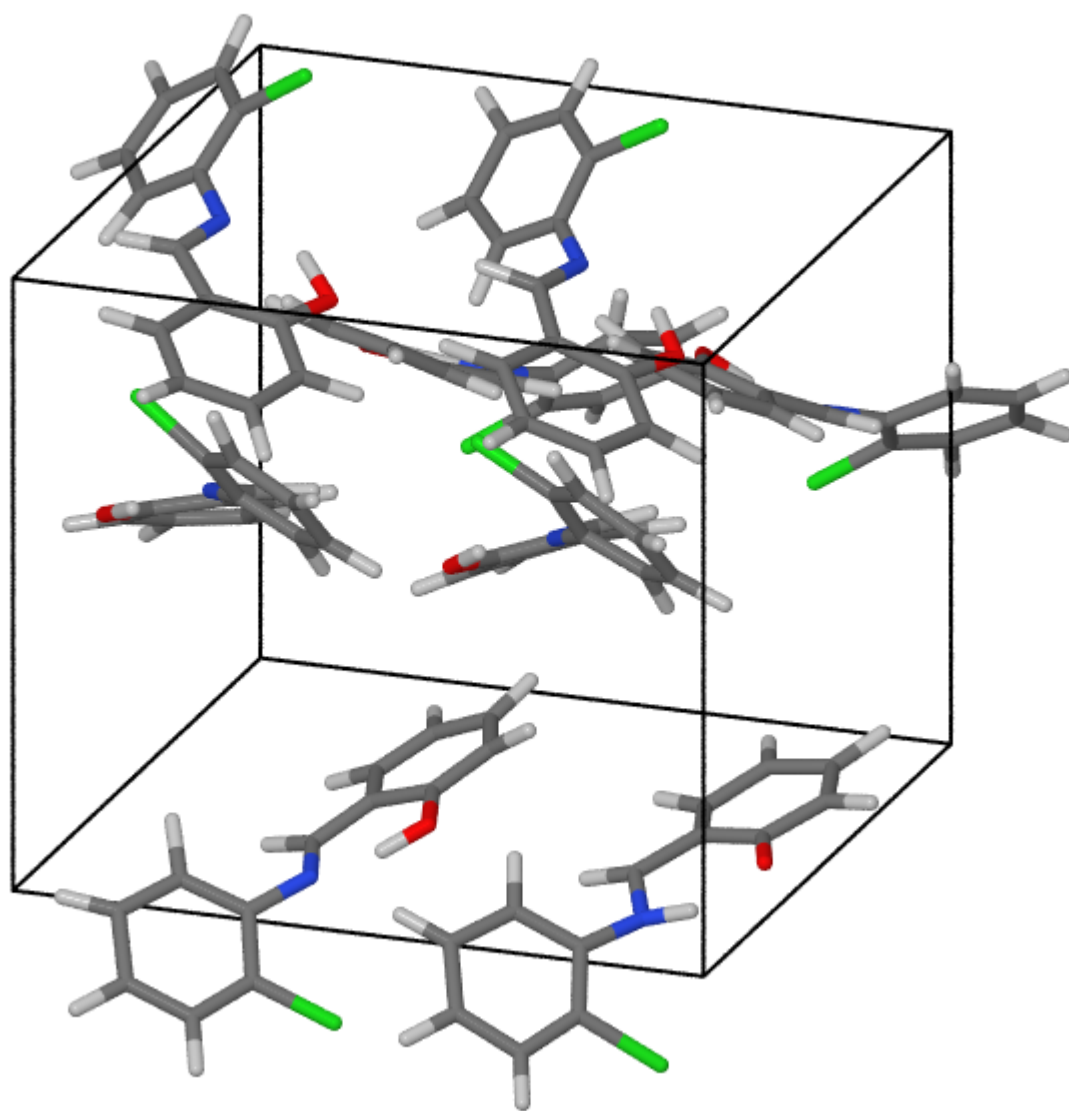

$$t = 35 \text{ fs} \quad E(S_1) - E(S_0) = 2.251 \text{ eV}$$

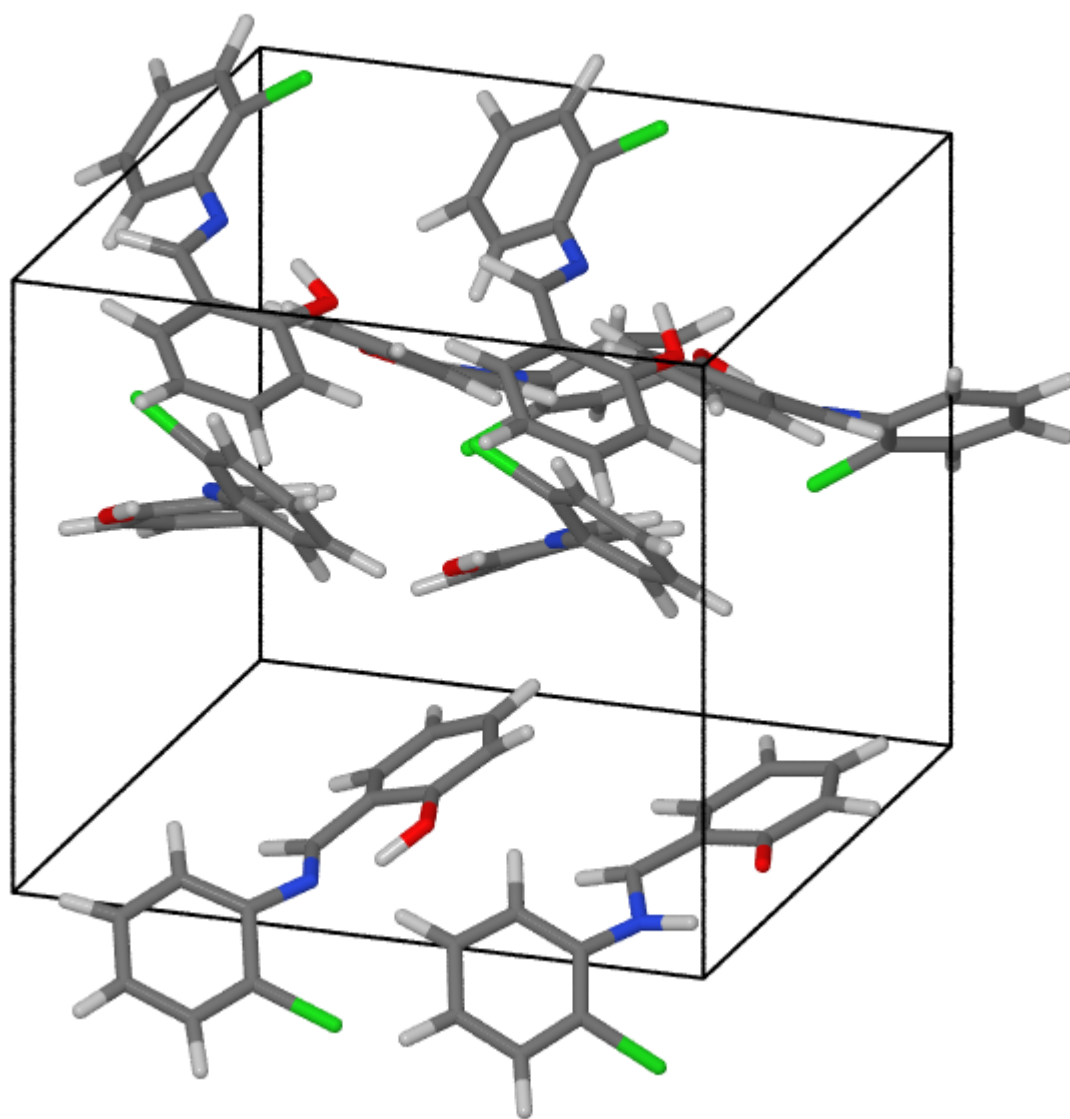

$$t = 40 \text{ fs} \quad E(S_1) - E(S_0) = 2.291 \text{ eV}$$

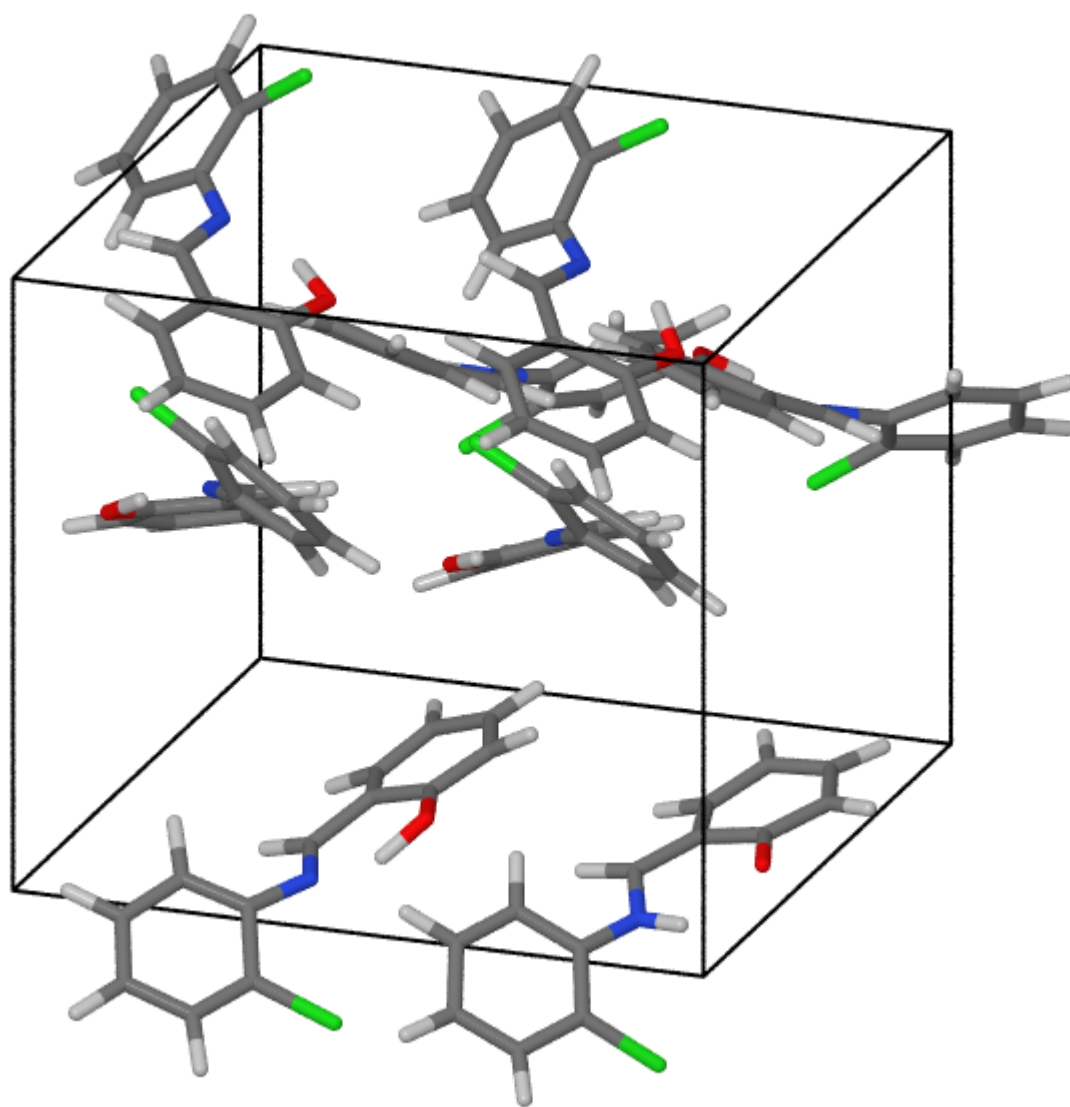

$$t = 240 \text{ fs} \quad E(S_1) - E(S_0) = 2.429 \text{ eV}$$

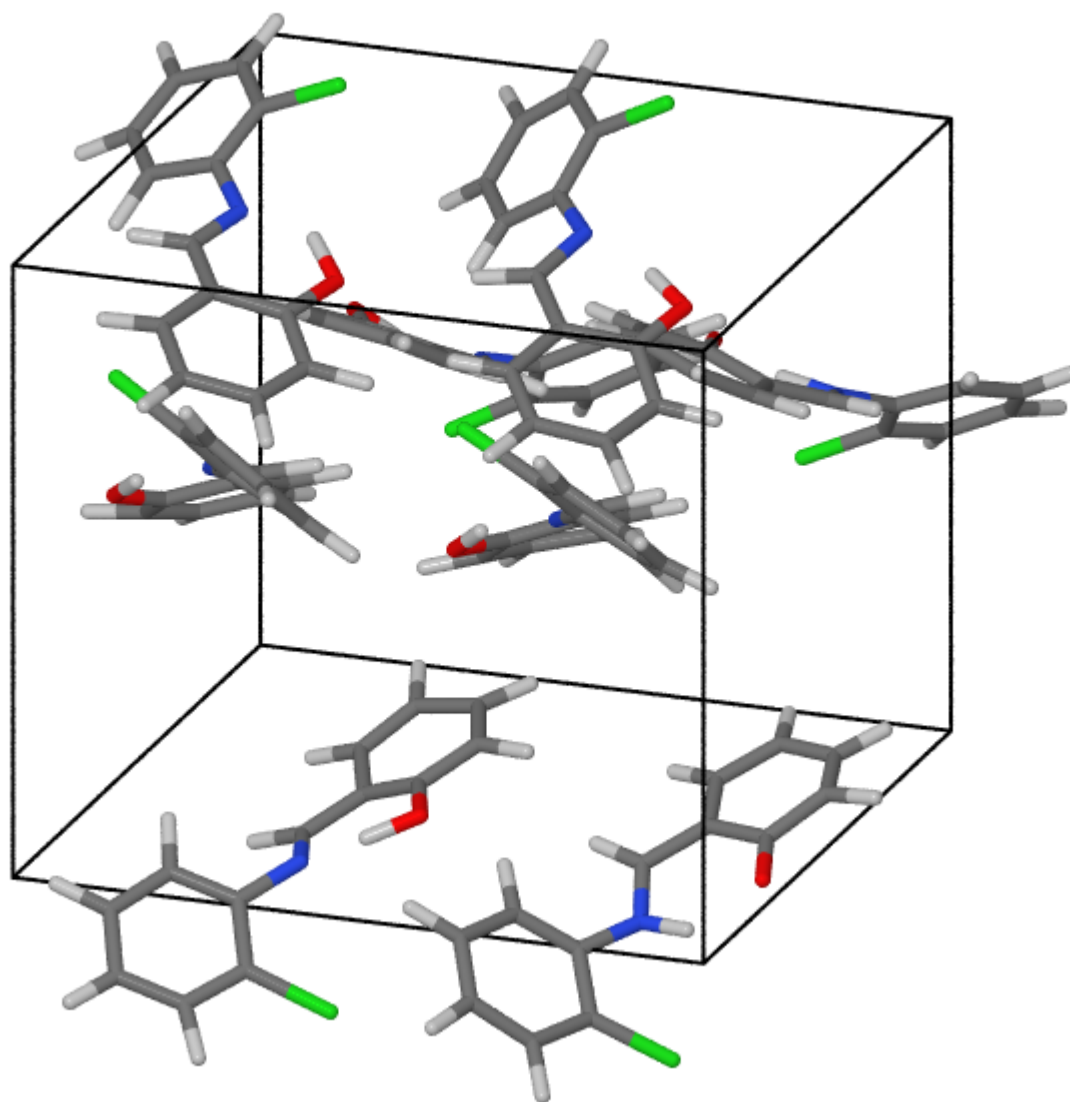

$$t = 250 \text{ fs} \quad E(S_1) - E(S_0) = 2.120 \text{ eV}$$

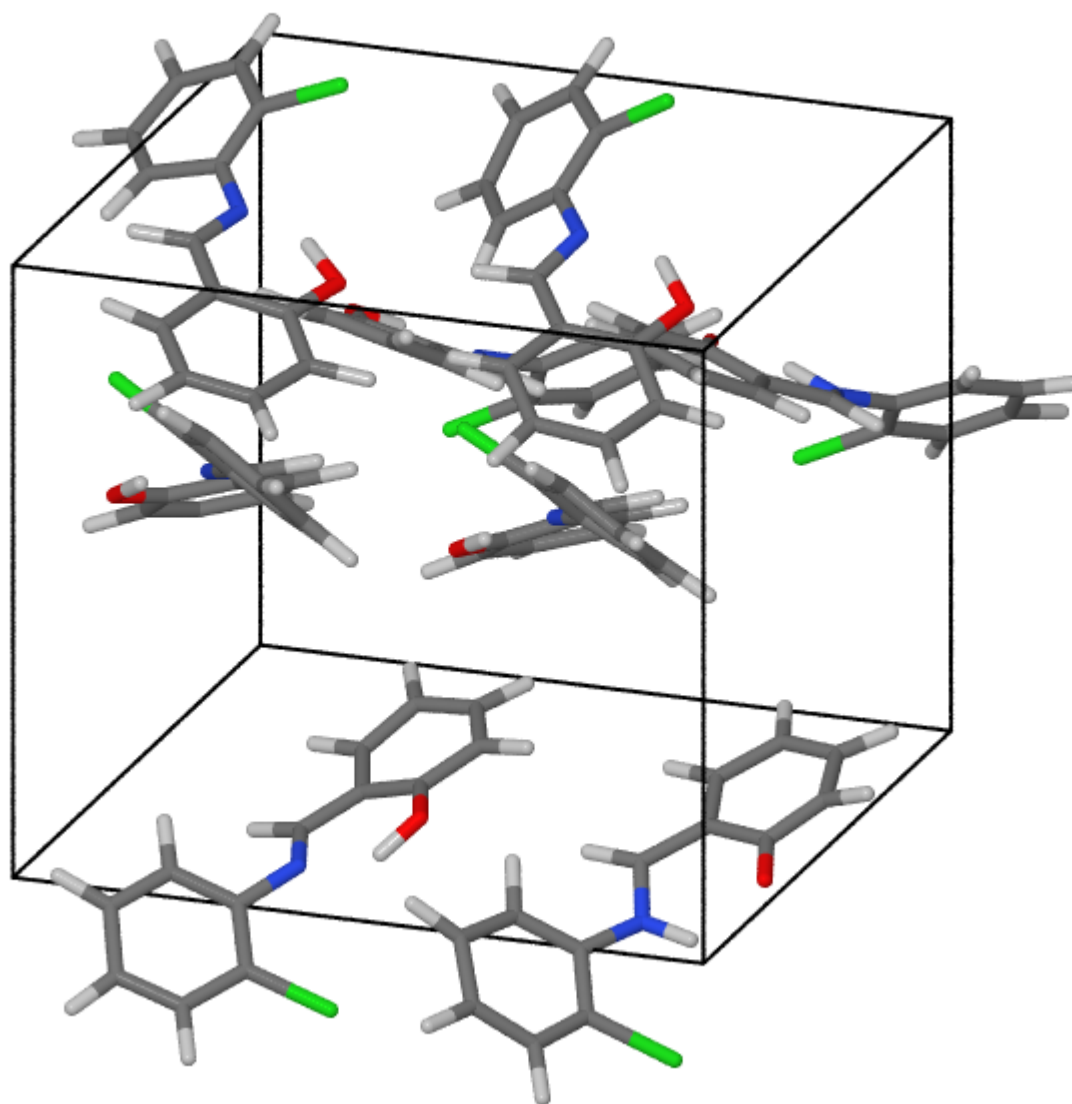

$$t = 260 \text{ fs} \quad E(S_1) - E(S_0) = 2.185 \text{ eV}$$

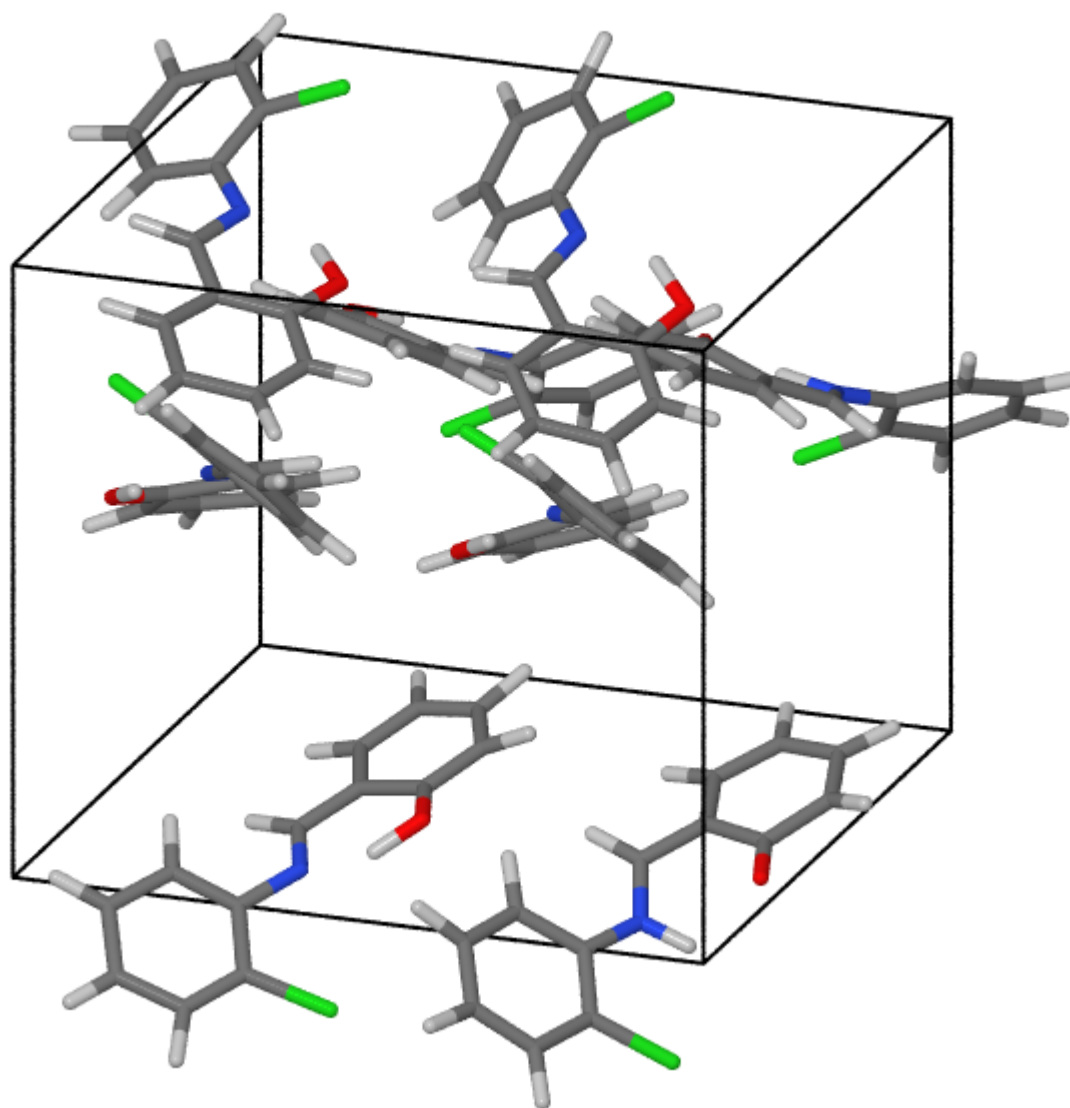



$$t = 270 \text{ fs} \quad E(S_1) - E(S_0) = 1.496 \text{ eV}$$

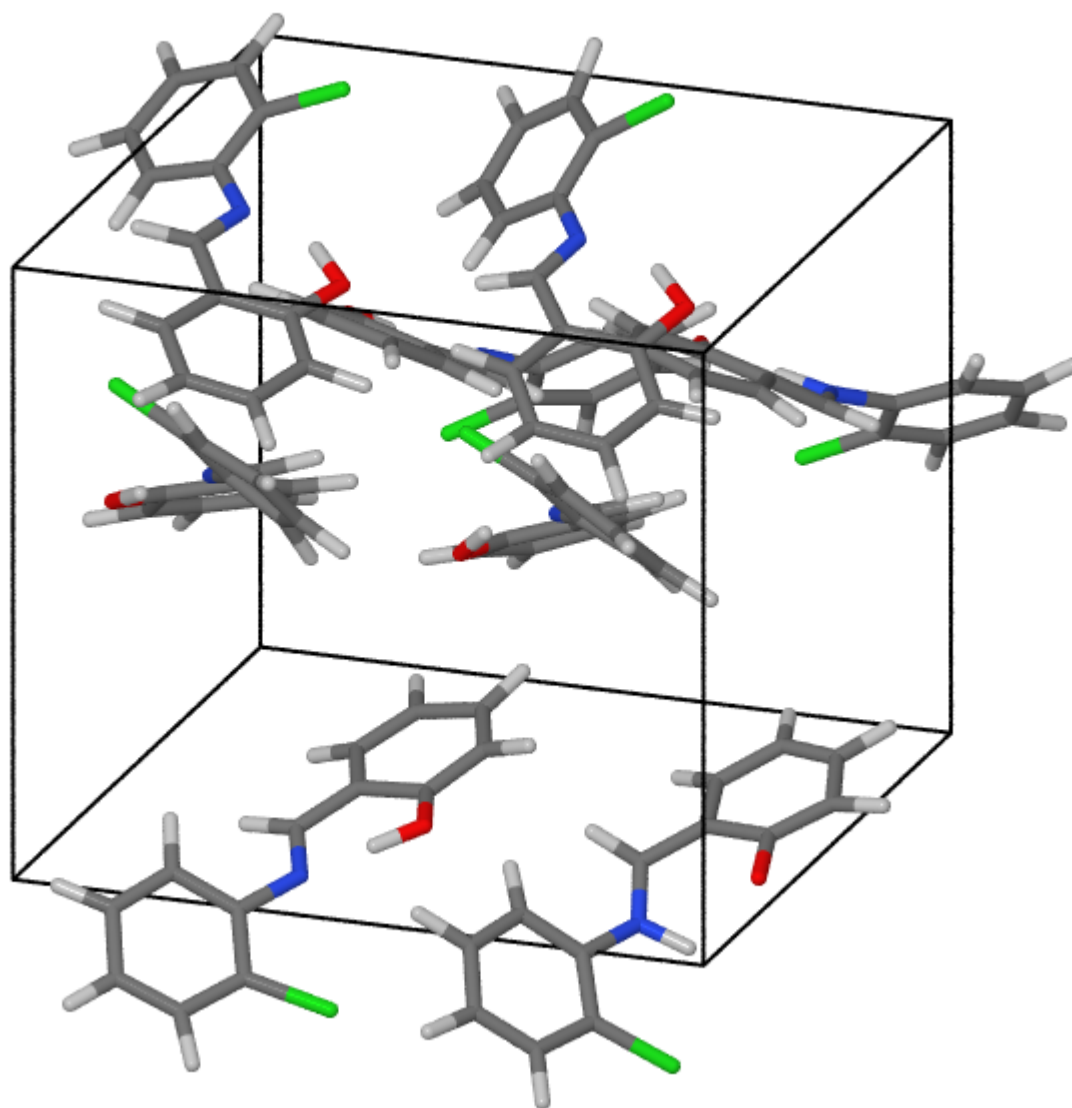

$$t = 280 \text{ fs} \quad E(S_1) - E(S_0) = 1.752 \text{ eV}$$

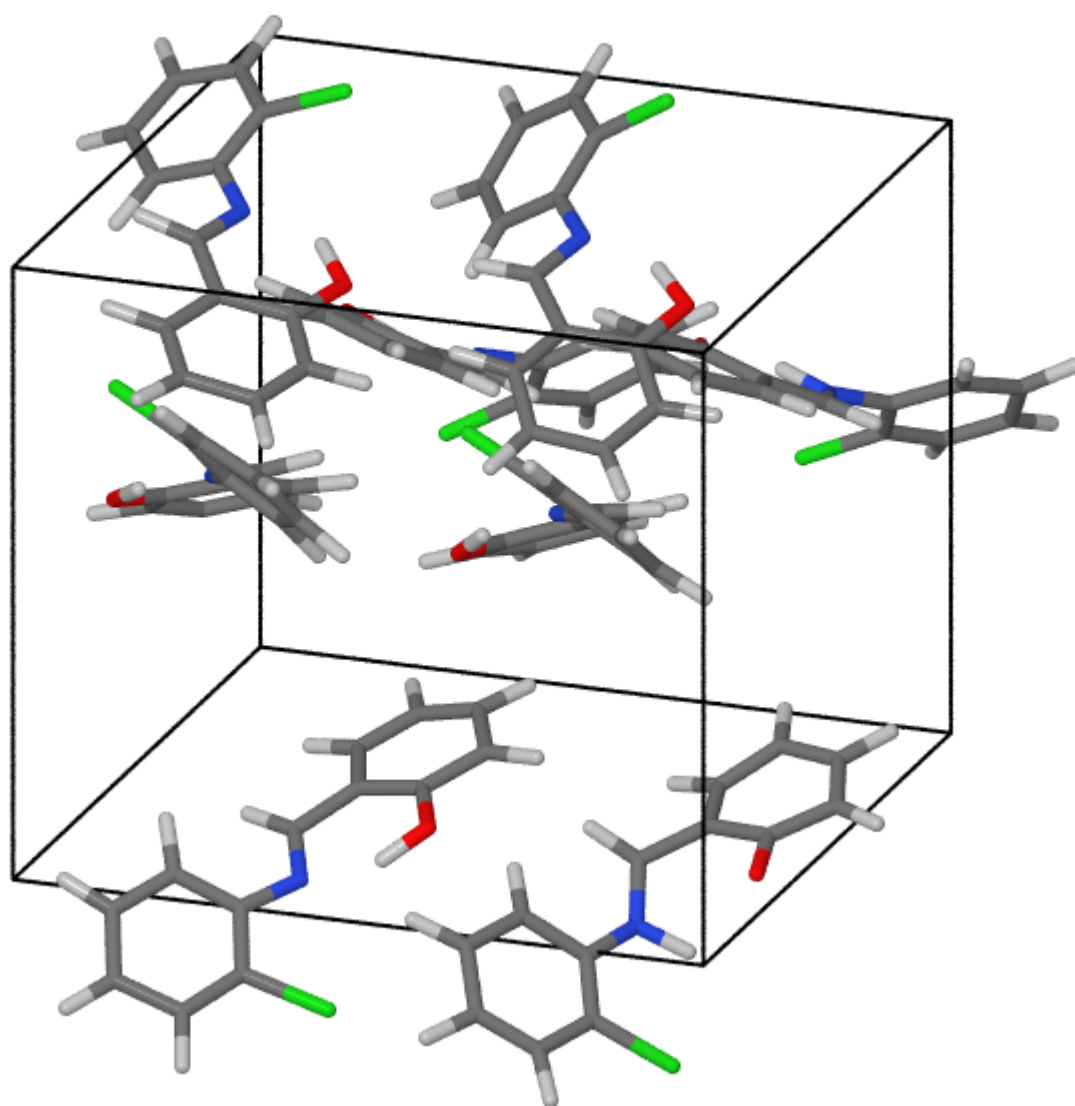

$$t = 290 \text{ fs} \quad E(S_1) - E(S_0) = 1.036 \text{ eV}$$

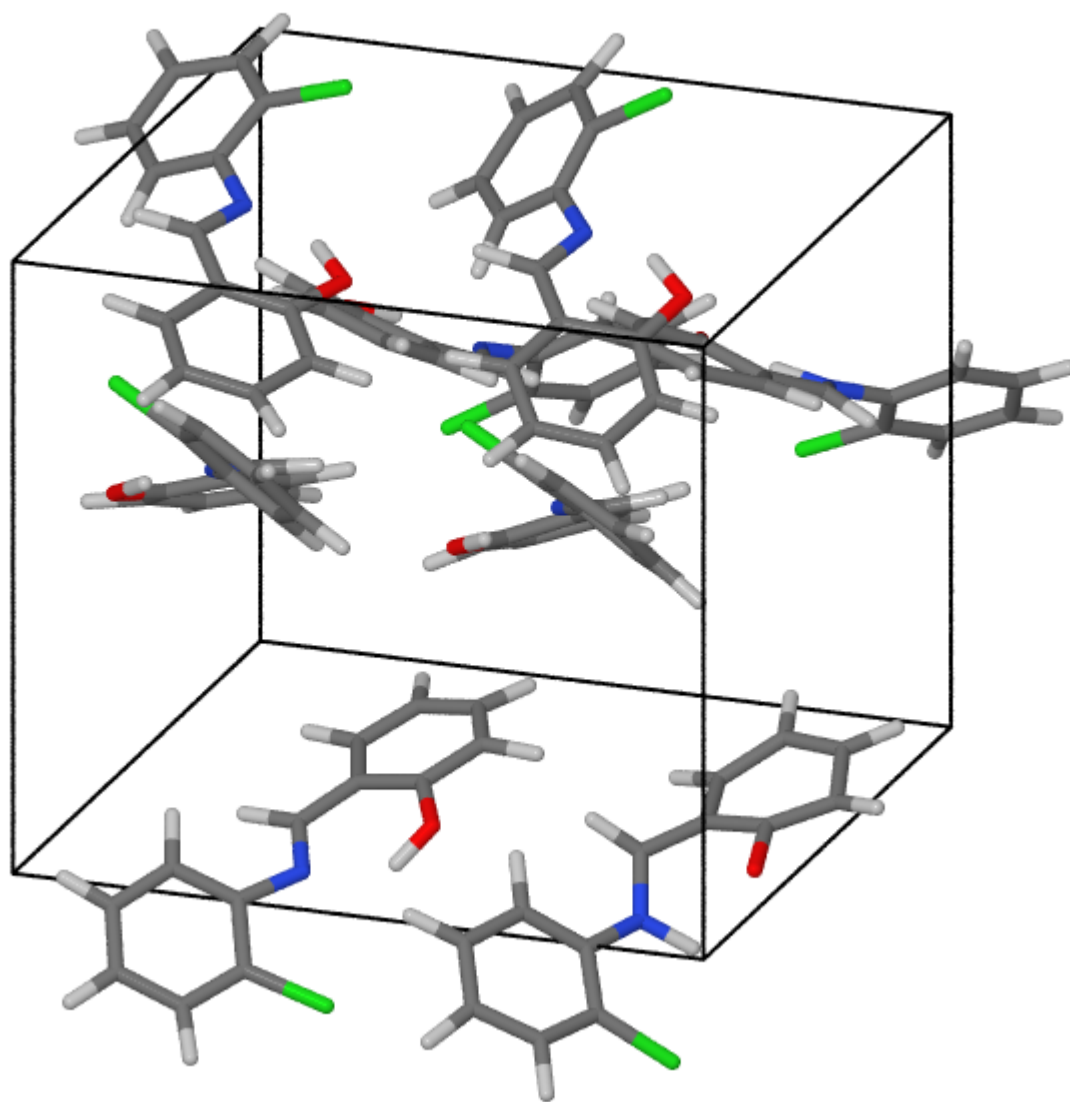

$$t = 300 \text{ fs} \quad E(S_1) - E(S_0) = 0.768 \text{ eV}$$

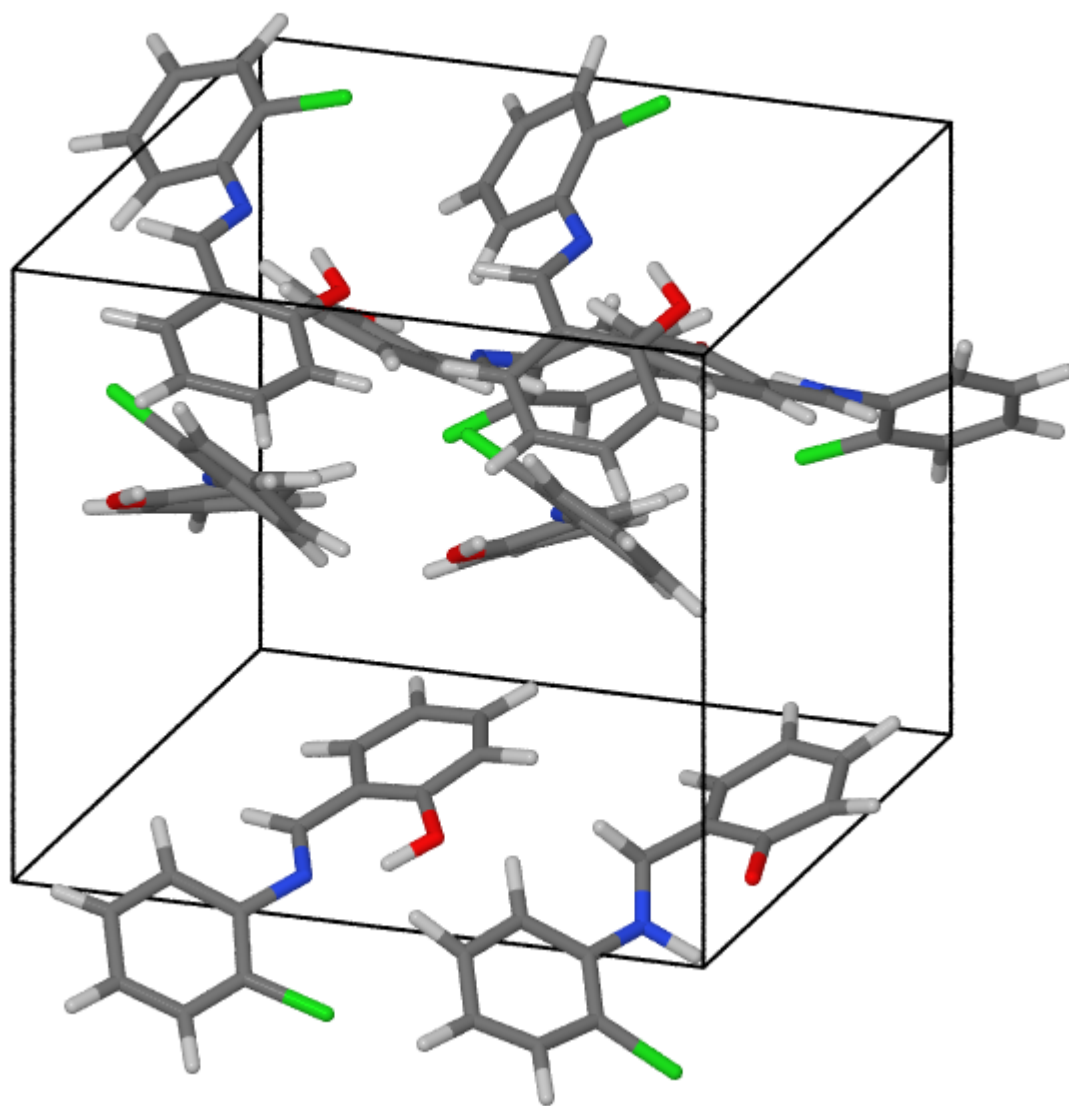

$$t = 310 \text{ fs} \quad E(S_1) - E(S_0) = 0.264 \text{ eV}$$

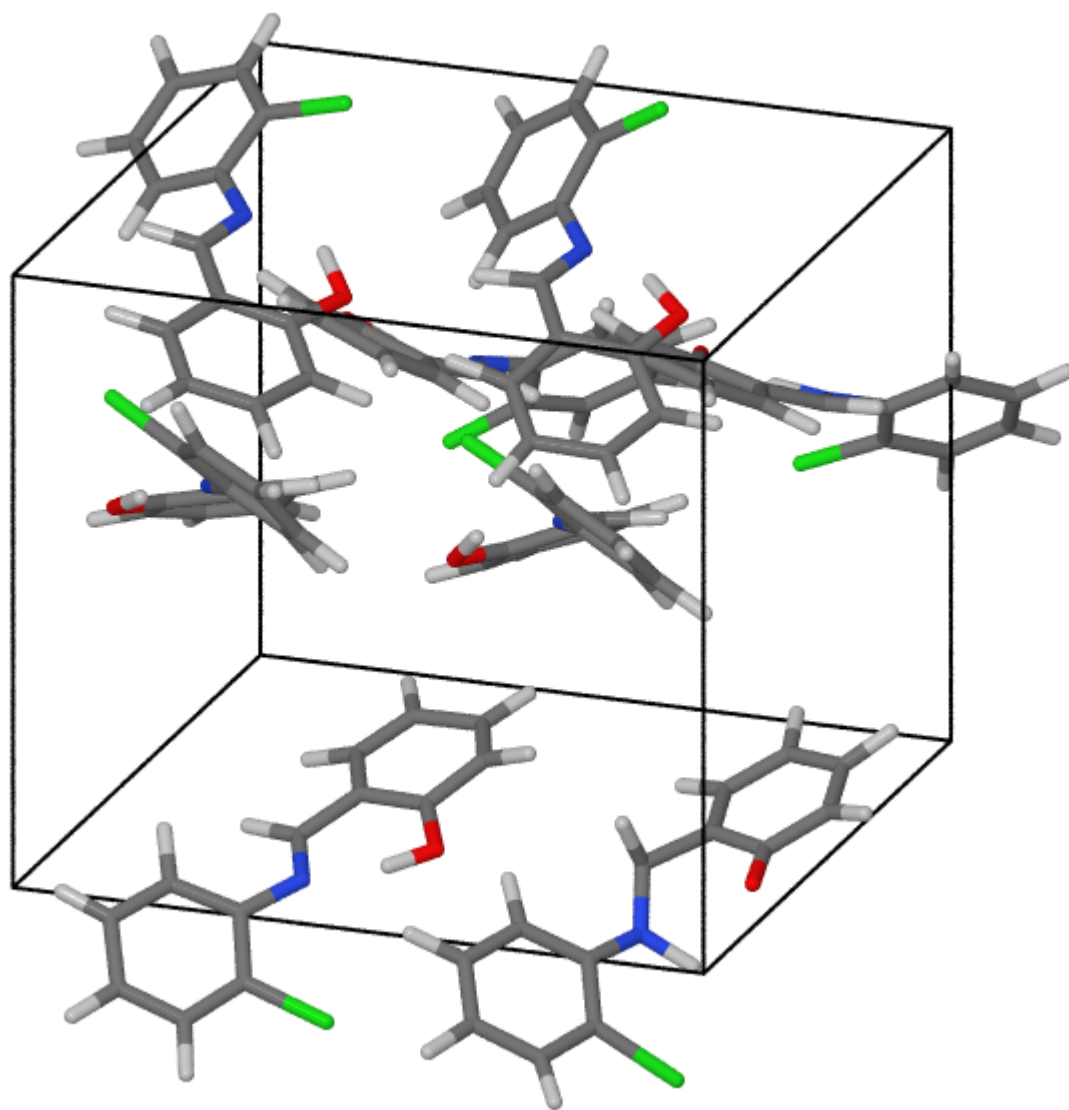

## Snapshots from Trajectory 3

$$t = 0 \text{ fs} \quad E(S_1) - E(S_0) = 3.699 \text{ eV}$$

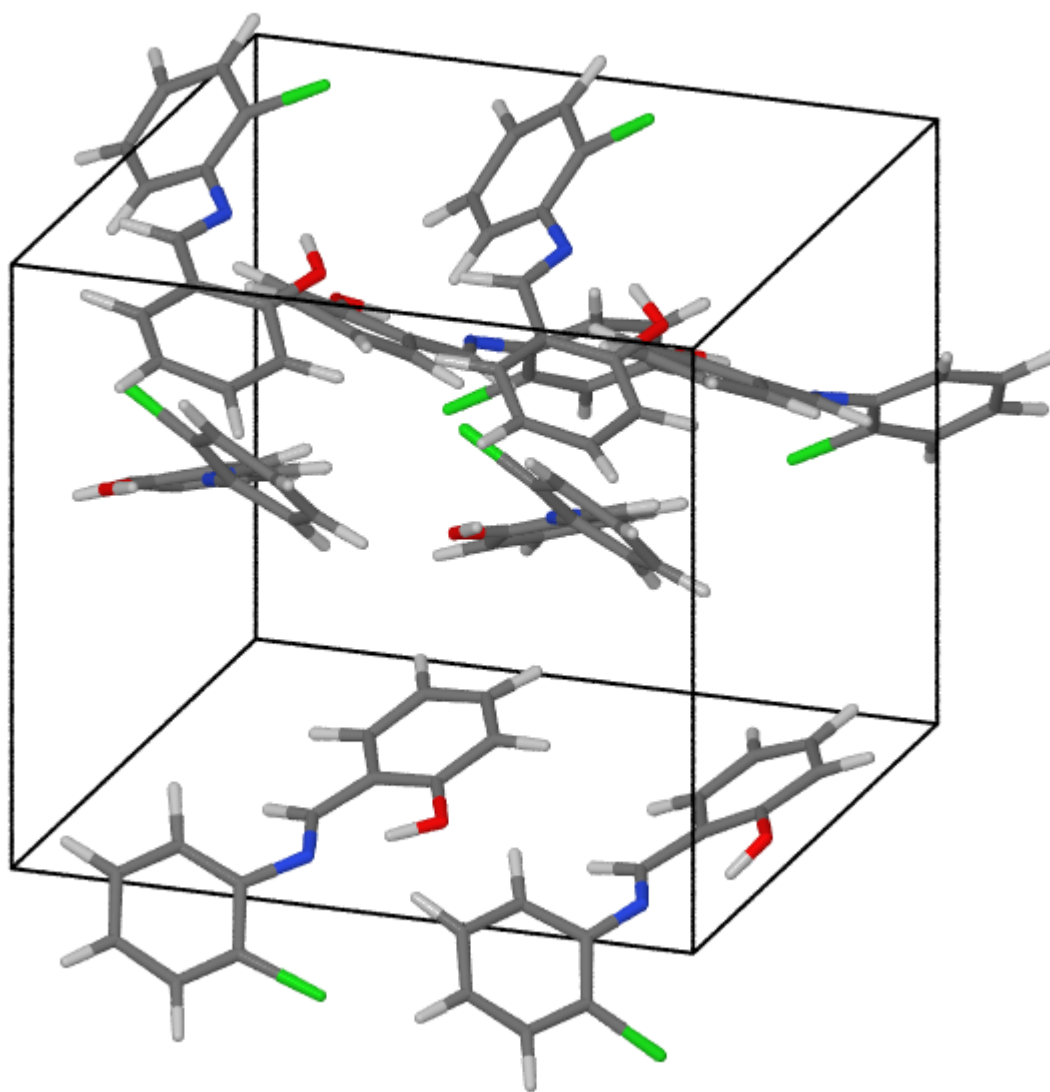

$$t = 10 \text{ fs} \quad E(S_1) - E(S_0) = 2.986 \text{ eV}$$

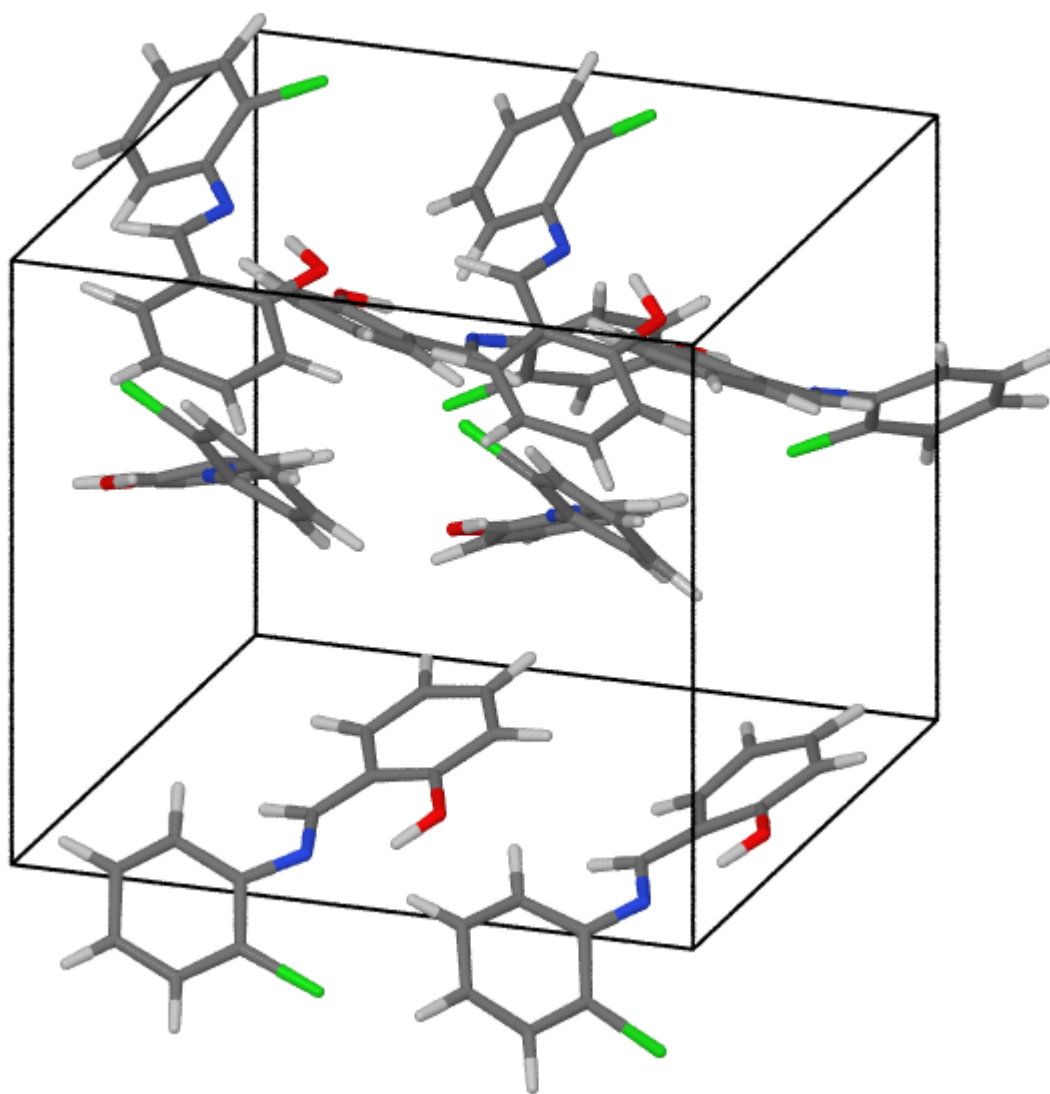

$$t = 20 \text{ fs} \quad E(S_1) - E(S_0) = 3.096 \text{ eV}$$

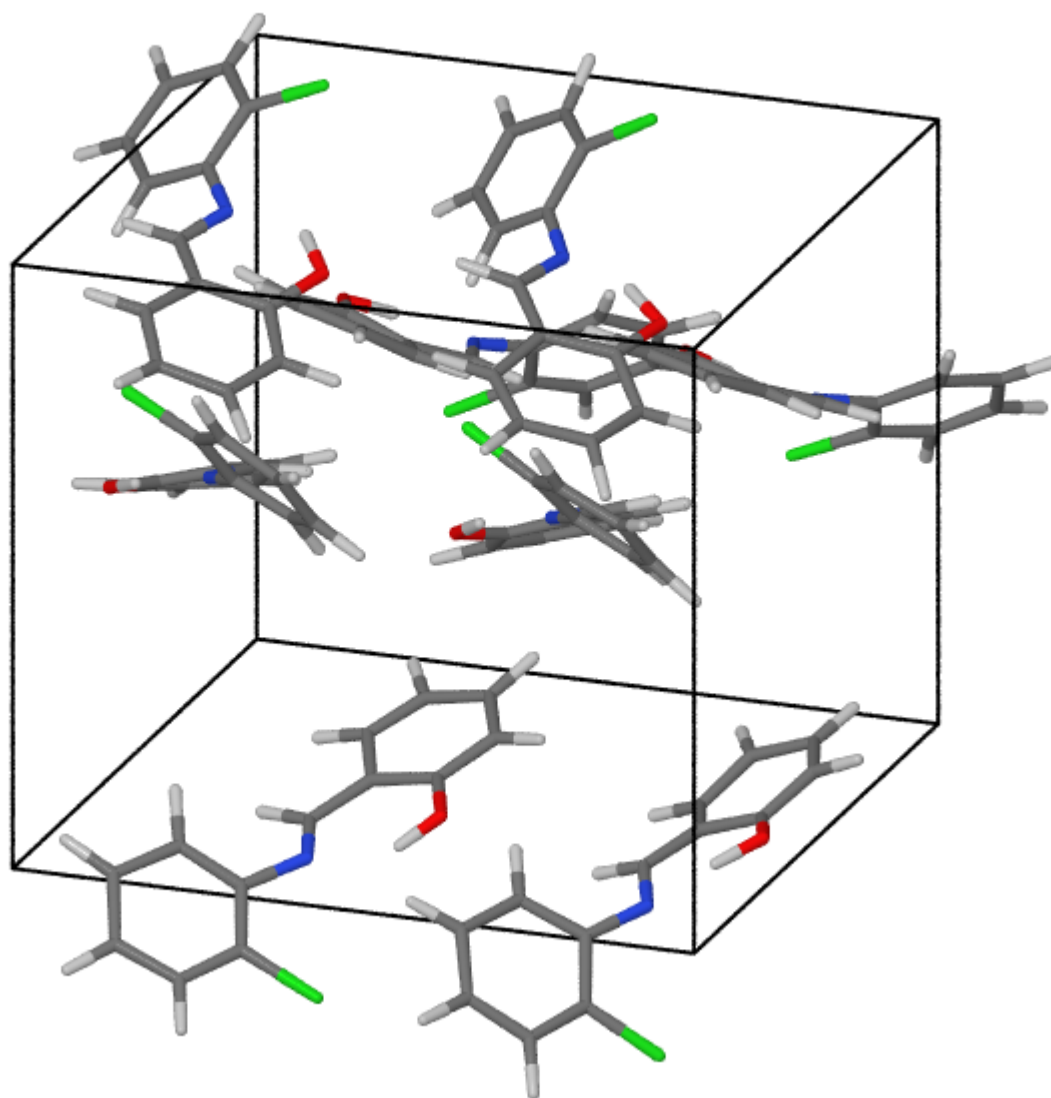



$$t = 30 \text{ fs} \quad E(S_1) - E(S_0) = 2.960 \text{ eV}$$

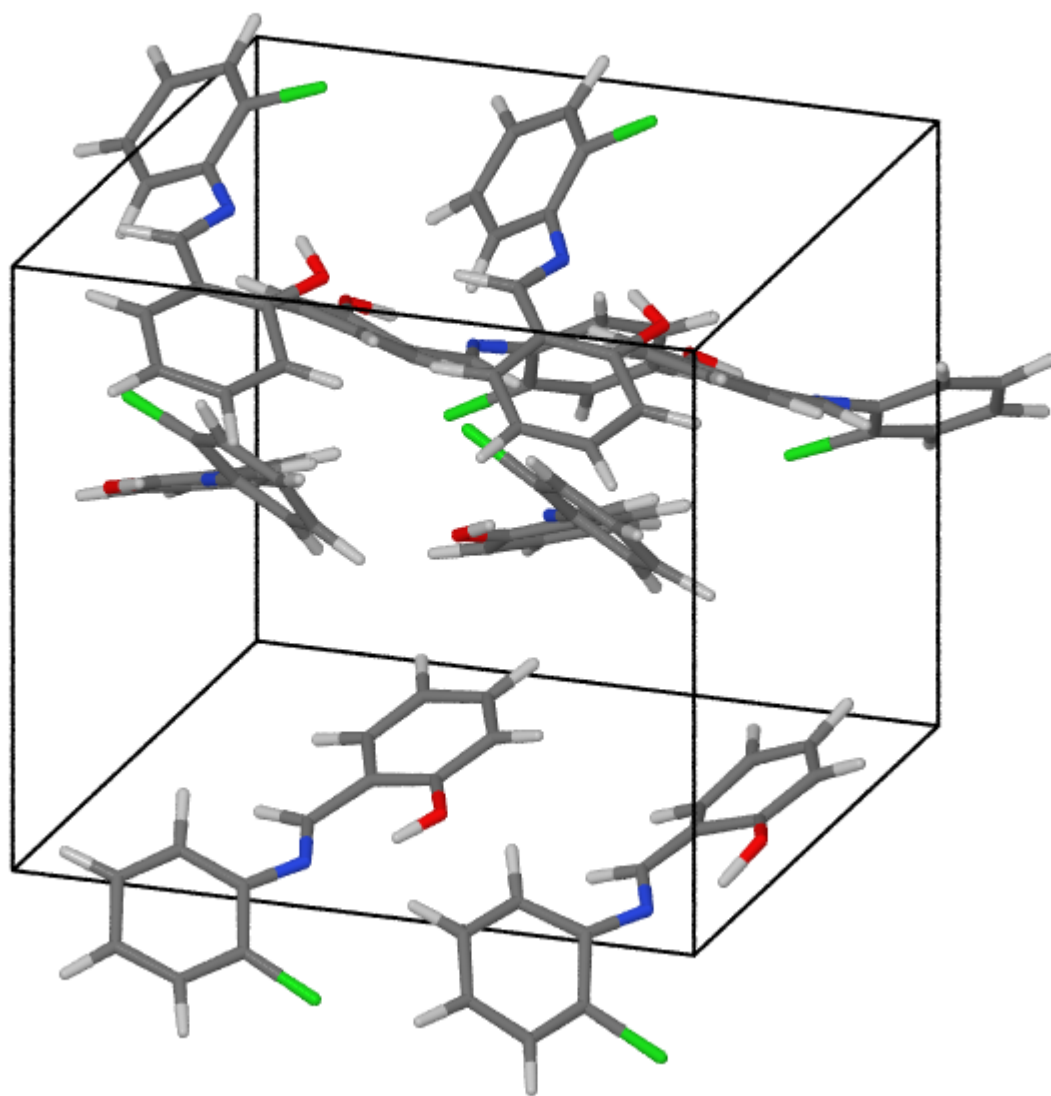

$$t = 40 \text{ fs} \quad E(S_1) - E(S_0) = 2.880 \text{ eV}$$

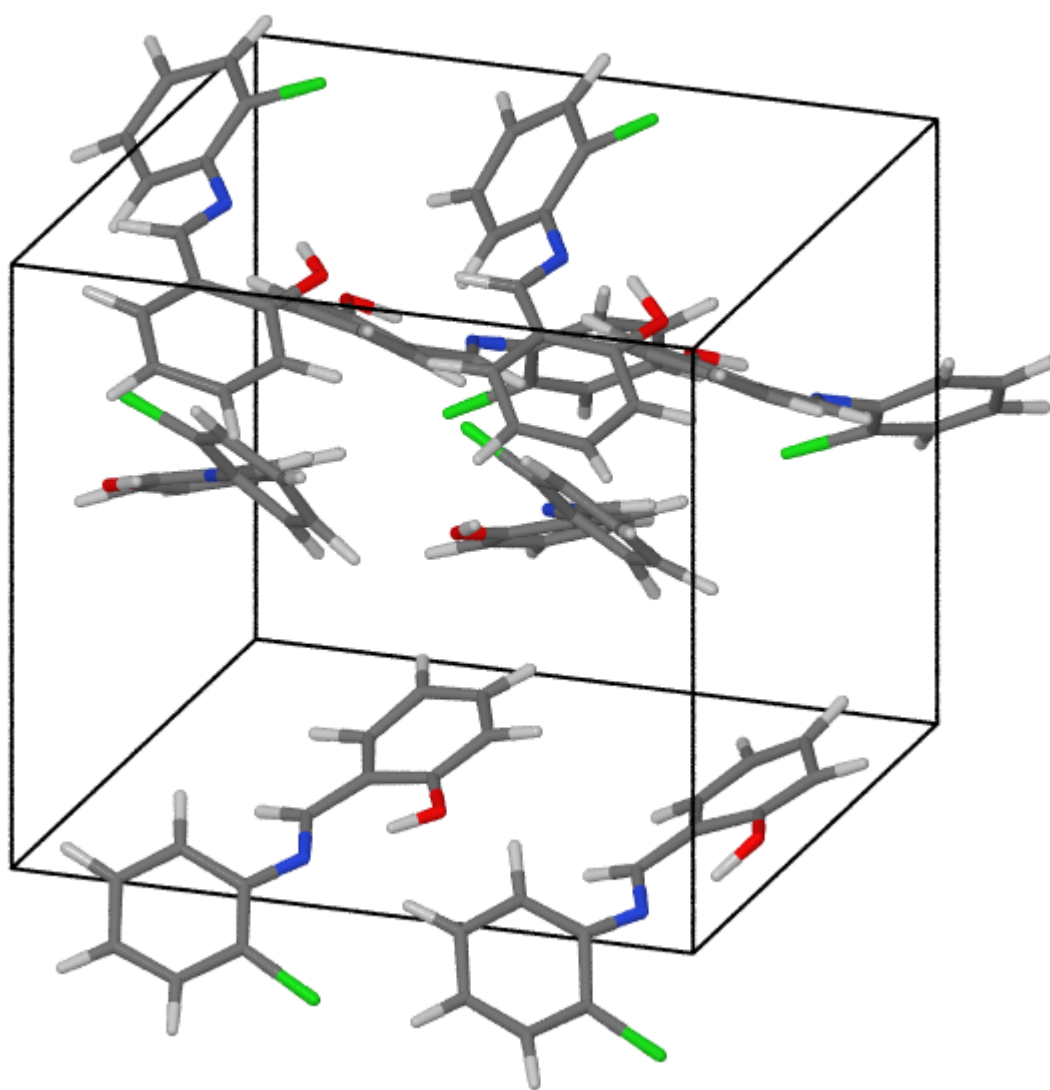

$$t = 50 \text{ fs} \quad E(S_1) - E(S_0) = 2.854 \text{ eV}$$

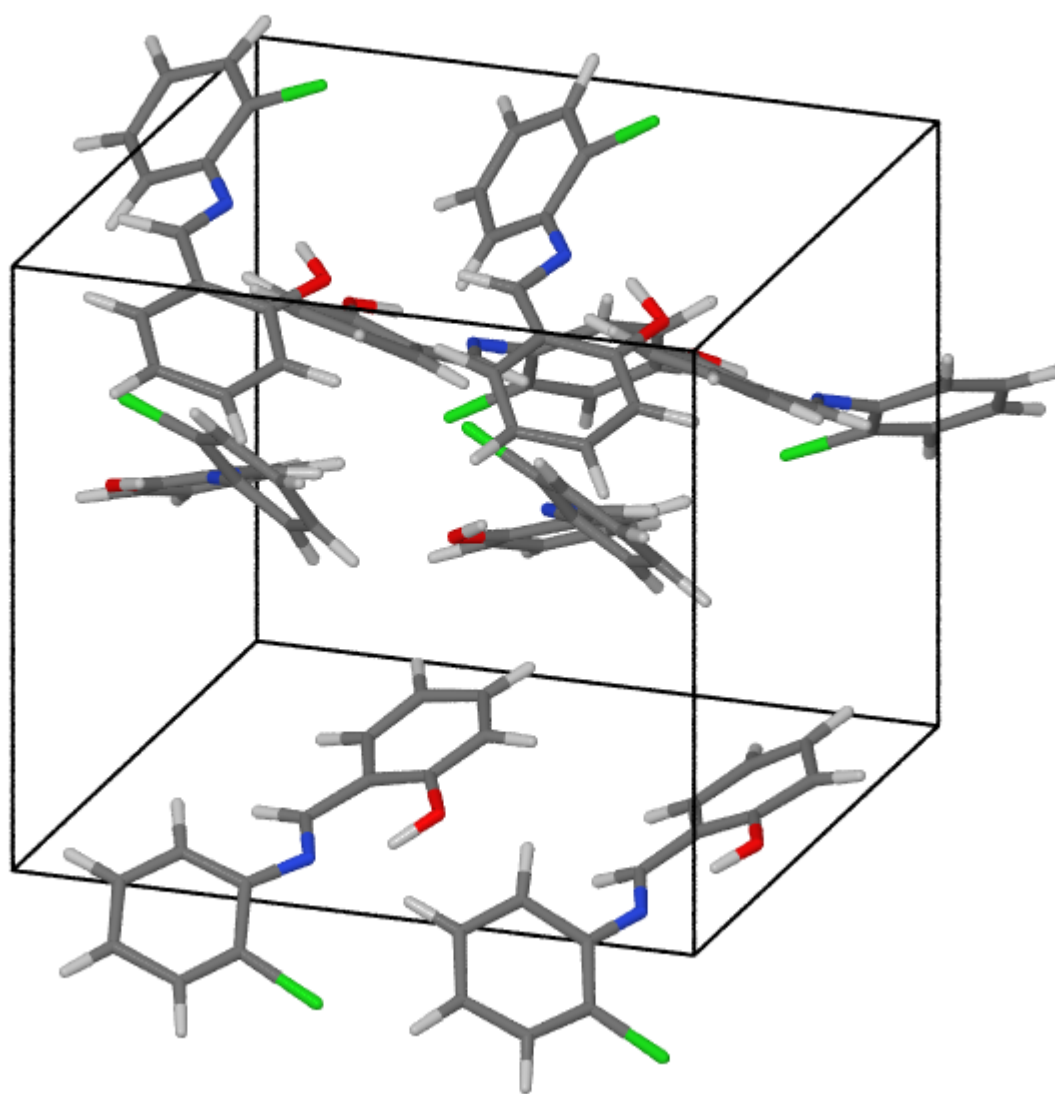

$$t = 60 \text{ fs} \quad E(S_1) - E(S_0) = 1.675 \text{ eV}$$

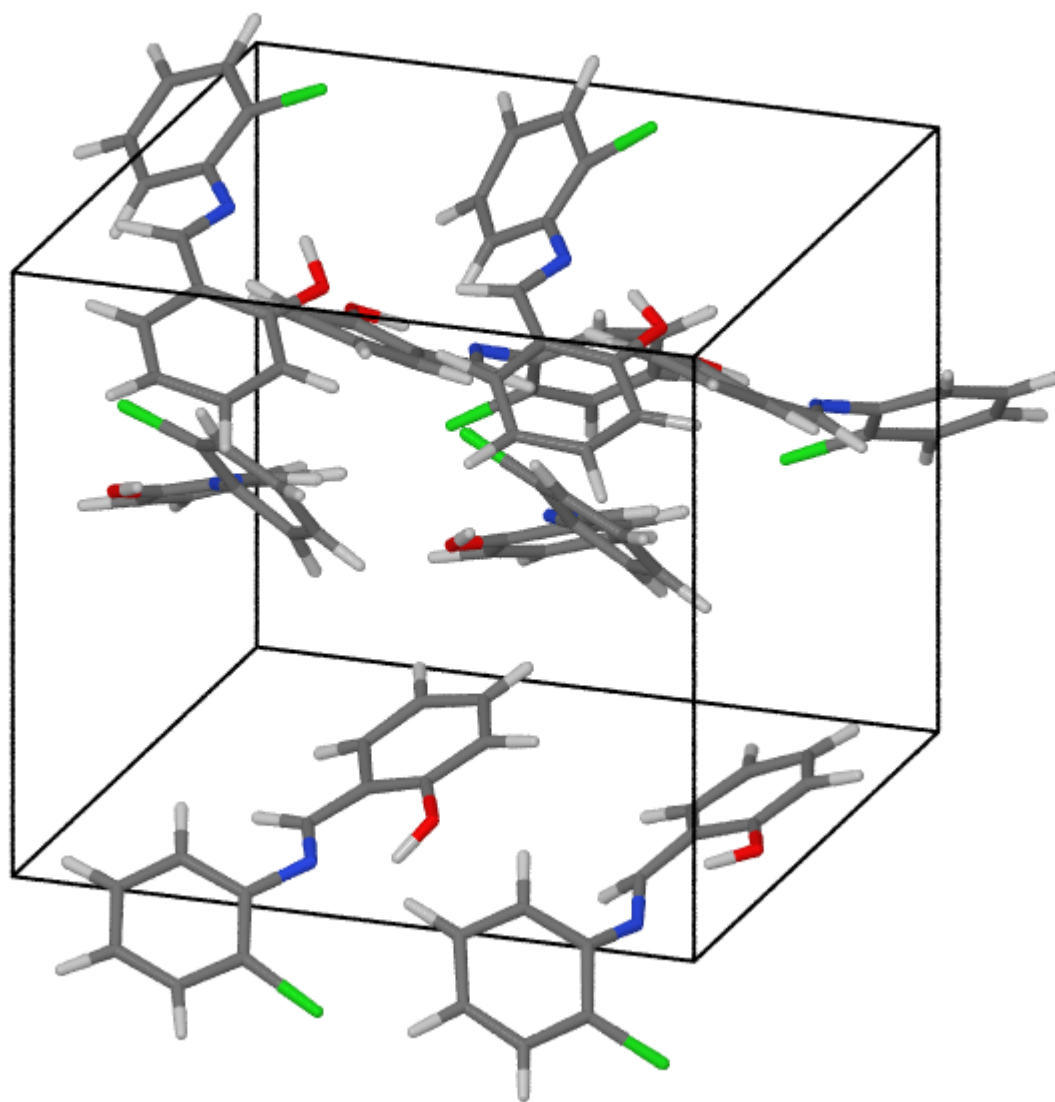

$$t = 70 \text{ fs} \quad E(S_1) - E(S_0) = 1.586 \text{ eV}$$

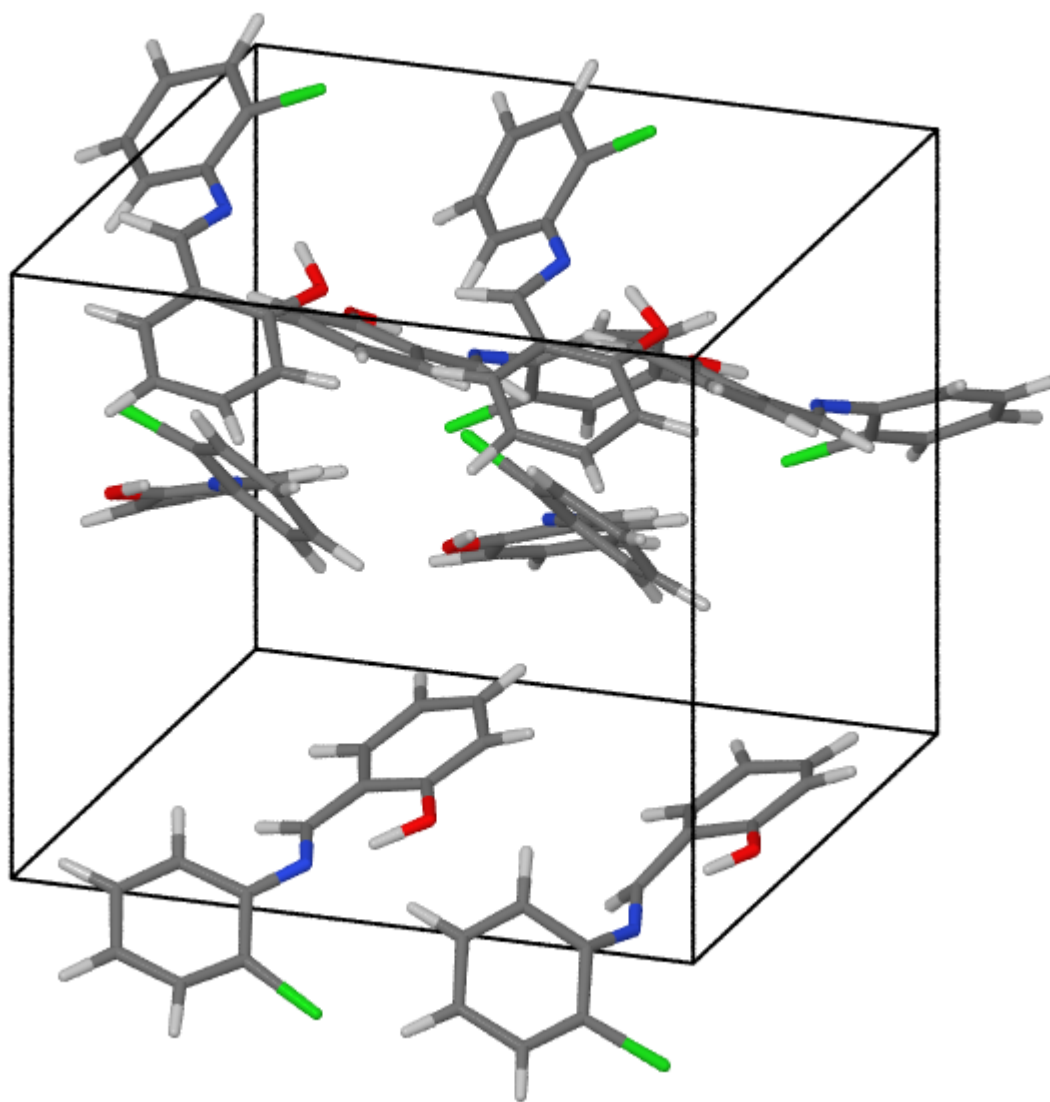

$$t = 80 \text{ fs} \quad E(S_1) - E(S_0) = 0.399 \text{ eV}$$

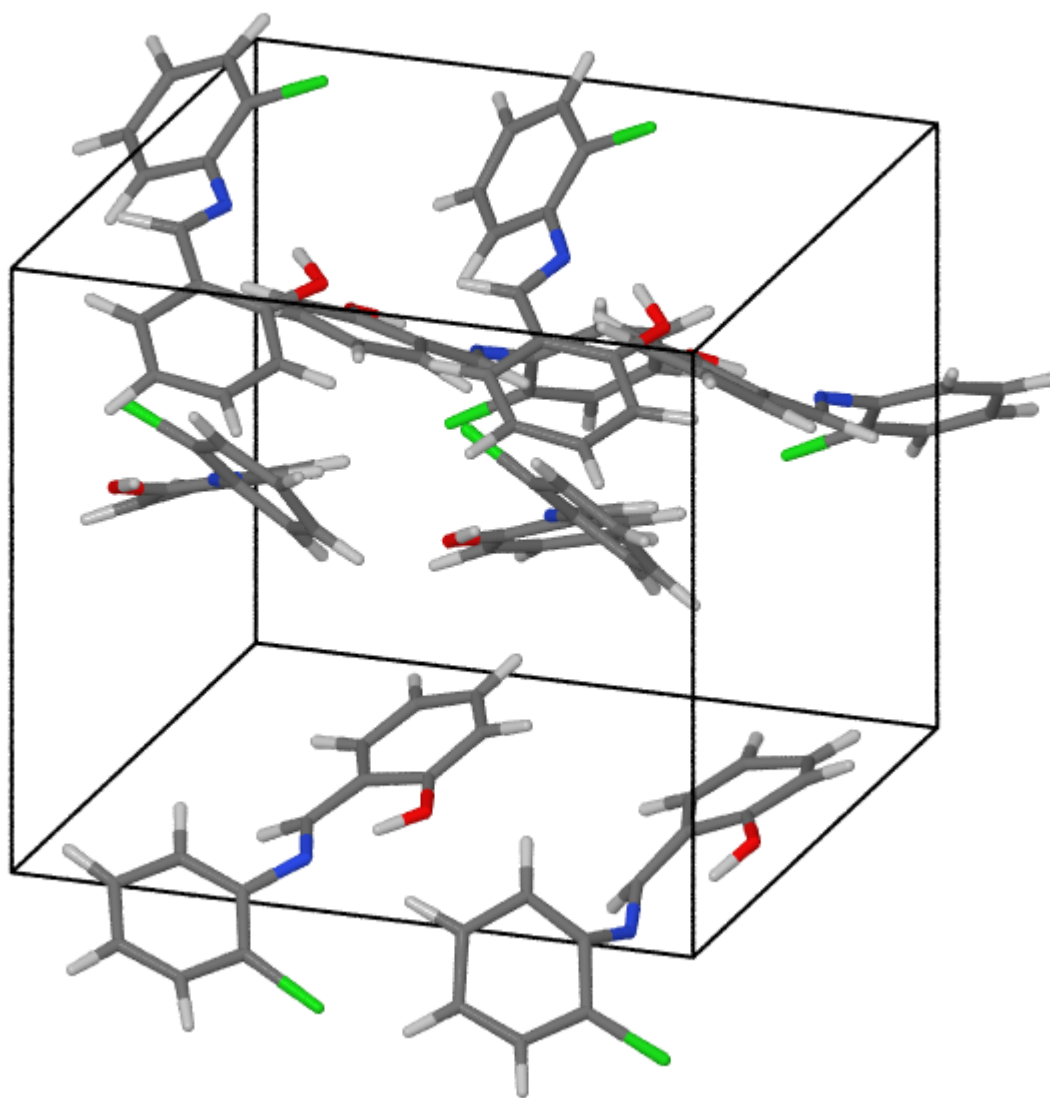

$$t = 90 \text{ fs} \quad E(S_1) - E(S_0) = 0.502 \text{ eV}$$

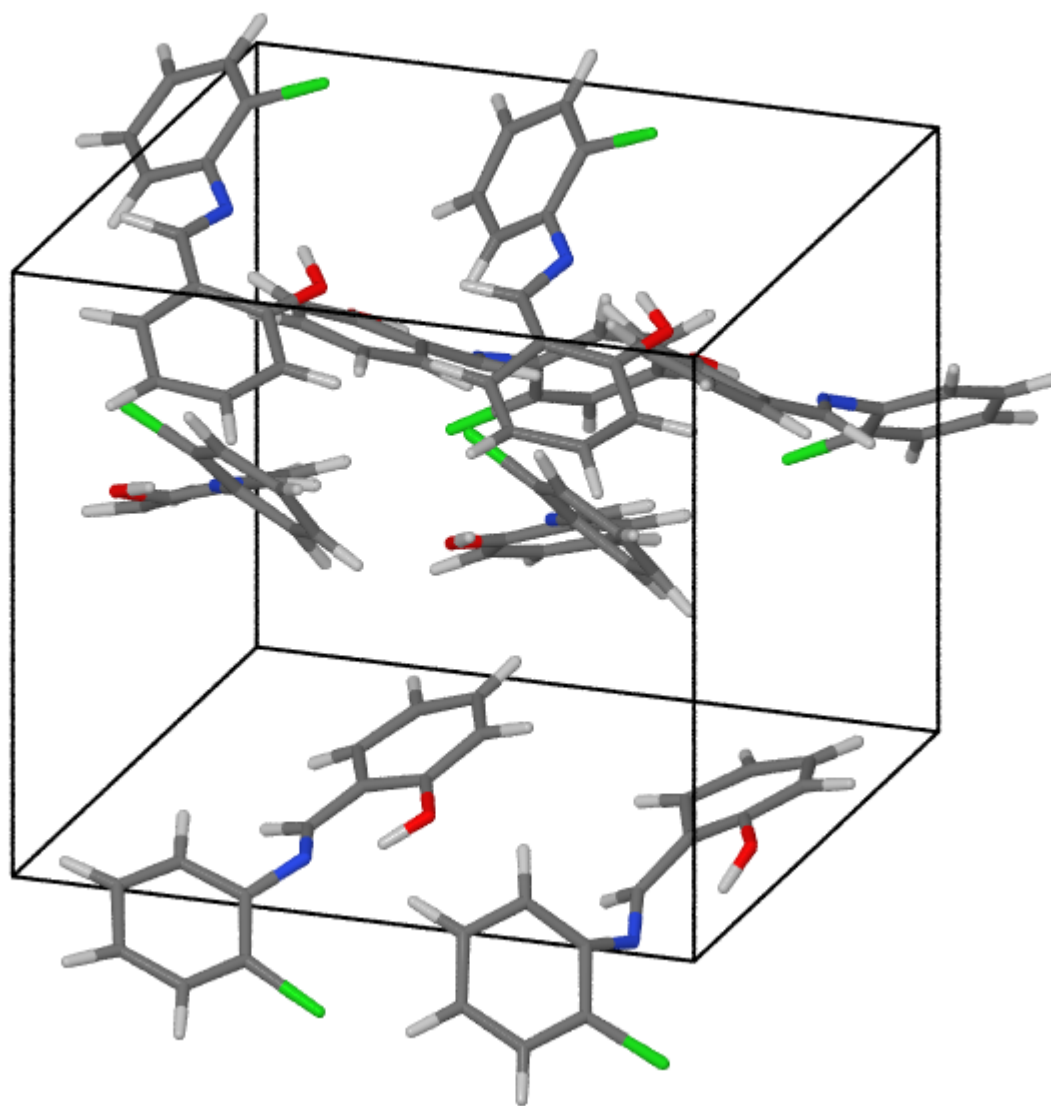

$$t = 100 \text{ fs} \quad E(S_1) - E(S_0) = 0.325 \text{ eV}$$

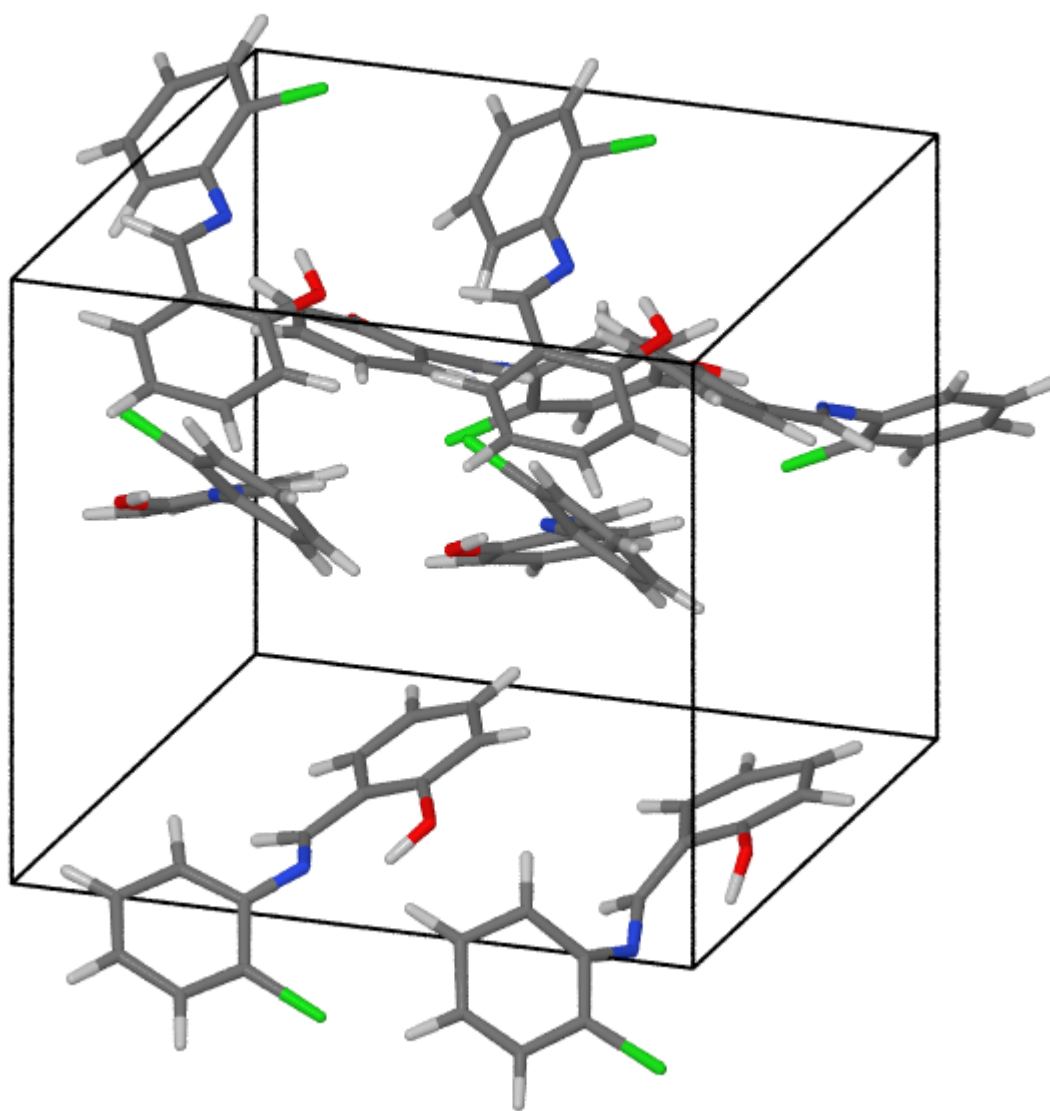



$$t = 110 \text{ fs} \quad E(S_1) - E(S_0) = 0.896 \text{ eV}$$

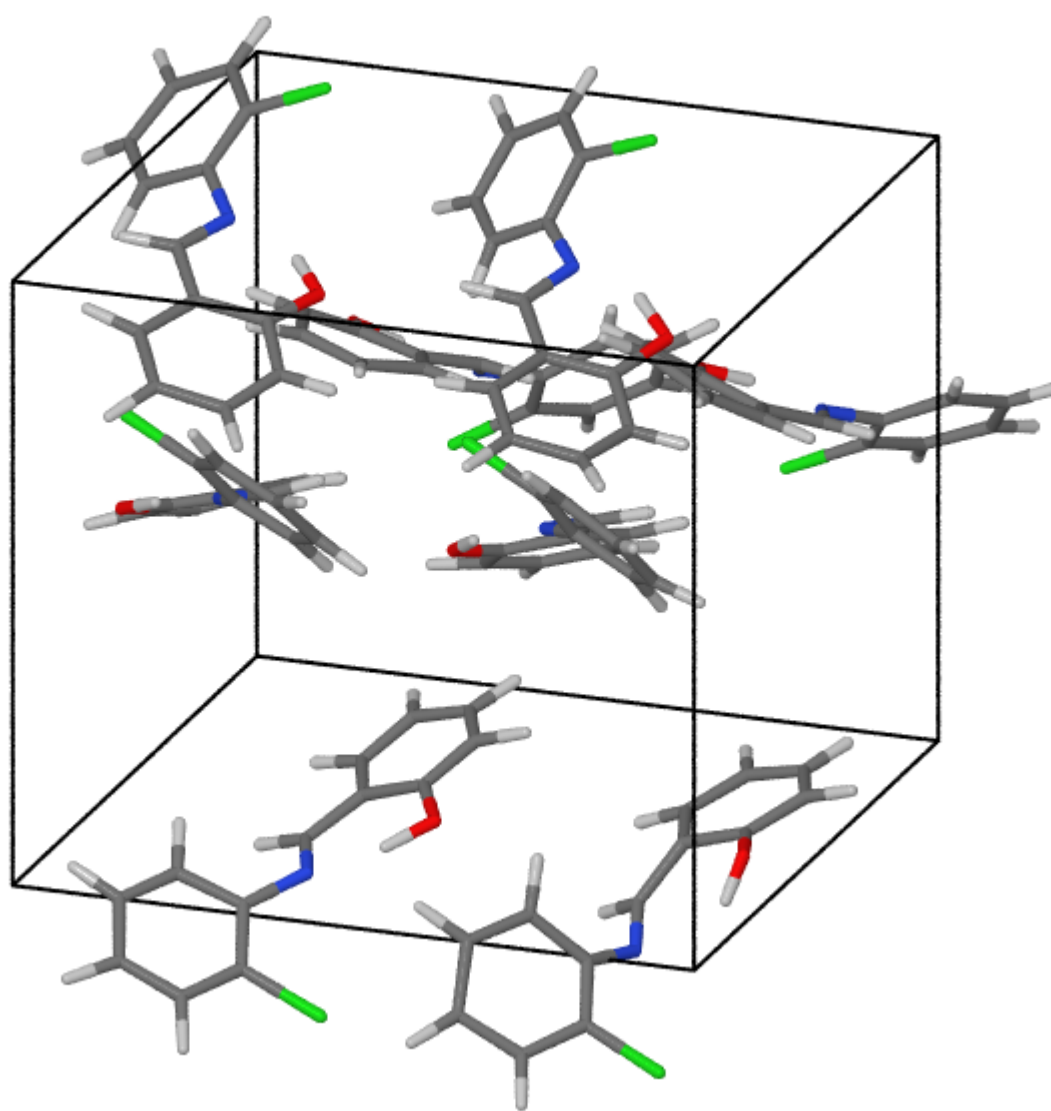

$$t = 120 \text{ fs} \quad E(S_1) - E(S_0) = 0.073 \text{ eV}$$

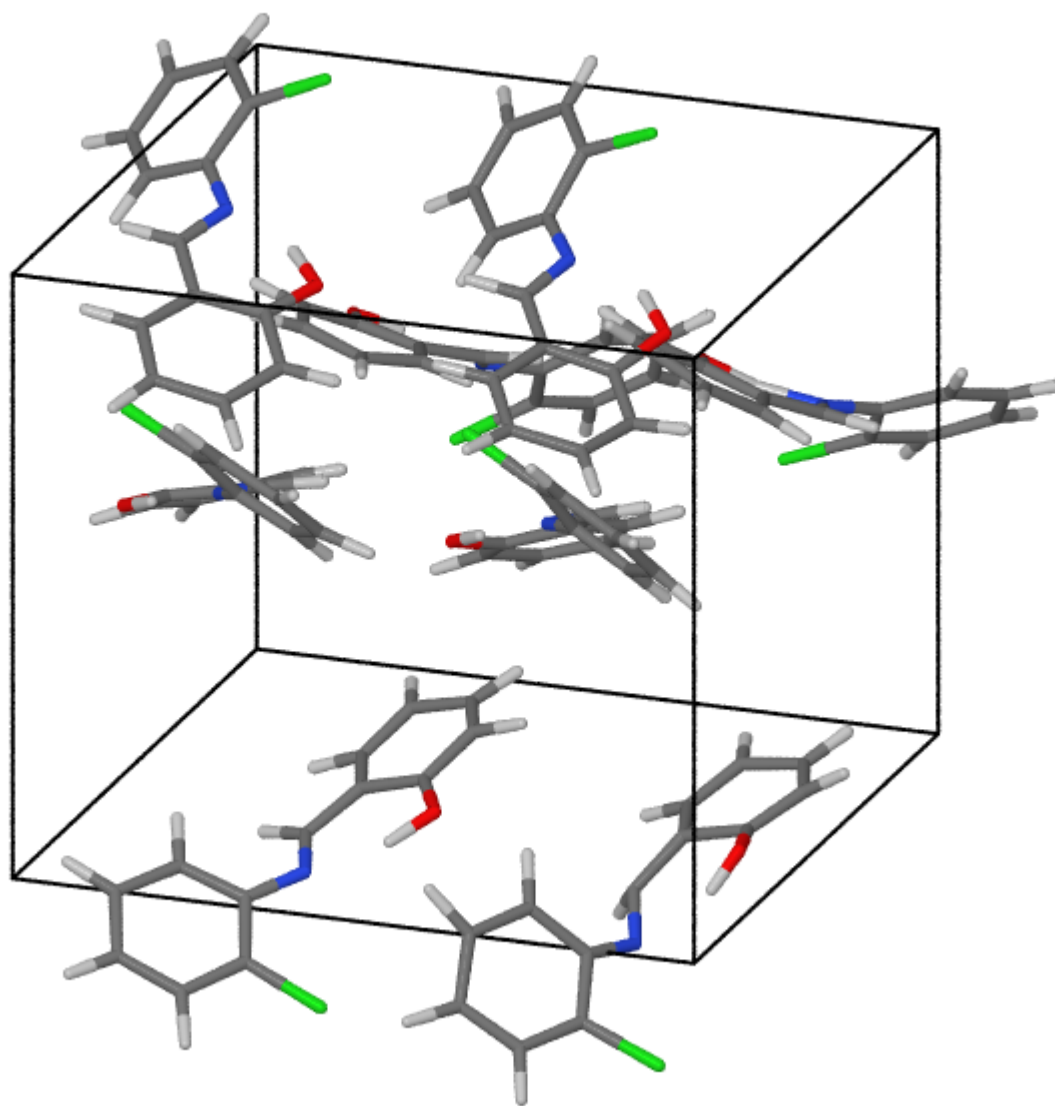

## Snapshots from Trajectory 3'

$$t = 440 \text{ fs} \quad E(S_1) - E(S_0) = 1.987 \text{ eV}$$

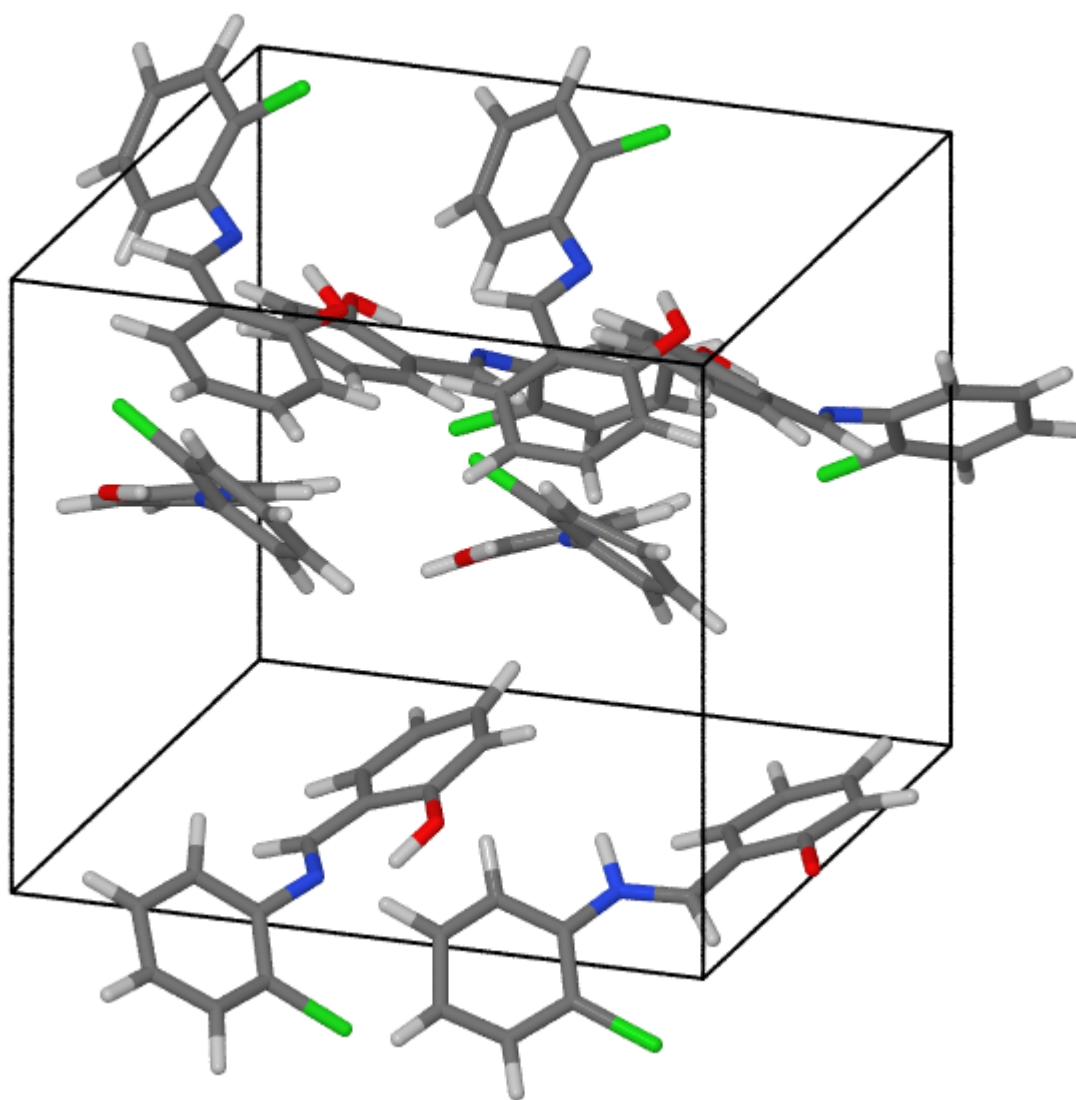

$$t = 450 \text{ fs} \quad E(S_1) - E(S_0) = 1.516 \text{ eV}$$

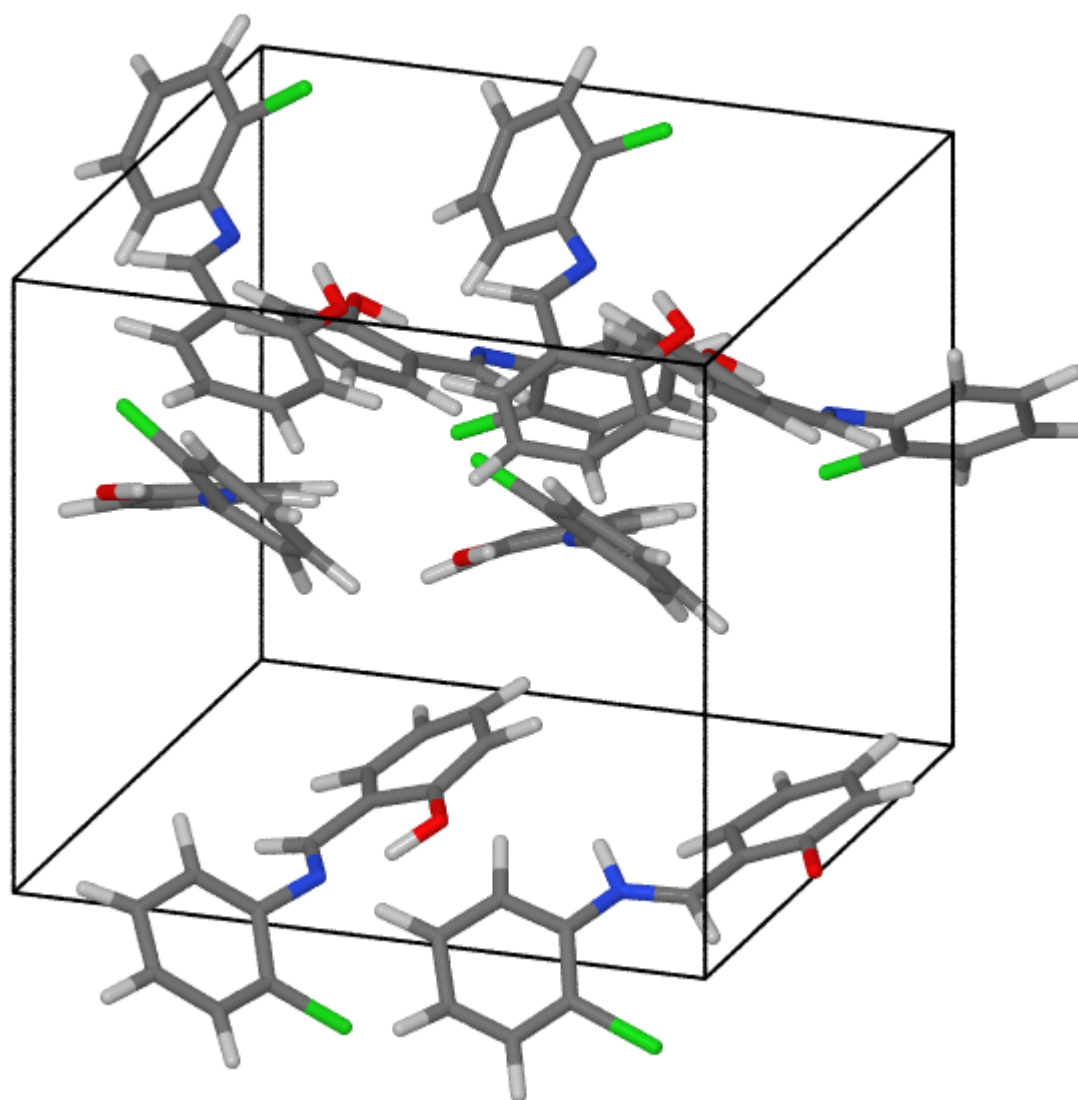

$$t = 460 \text{ fs} \quad E(S_1) - E(S_0) = 1.617 \text{ eV}$$

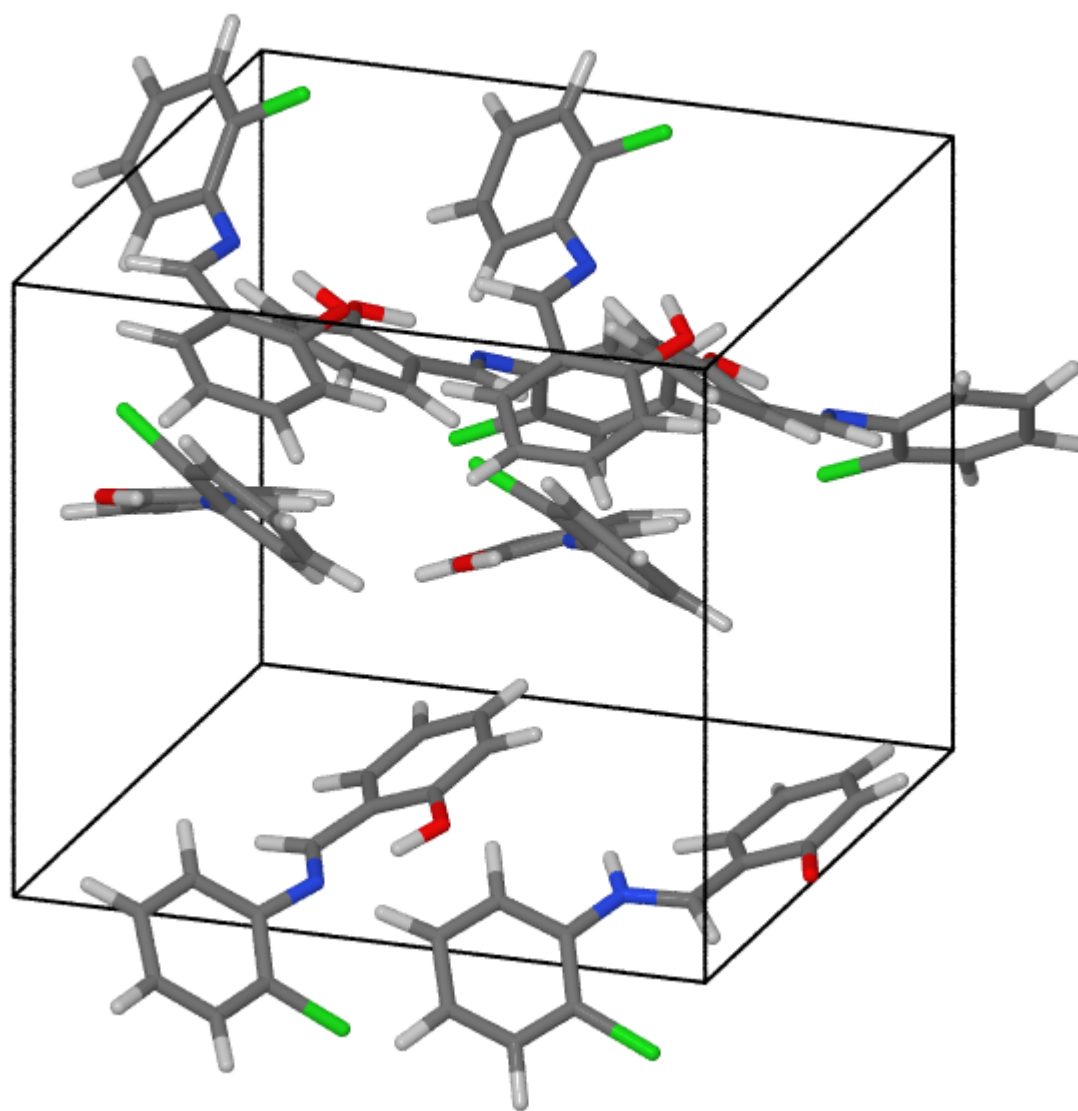

$$t = 470 \text{ fs} \quad E(S_1) - E(S_0) = 1.421 \text{ eV}$$

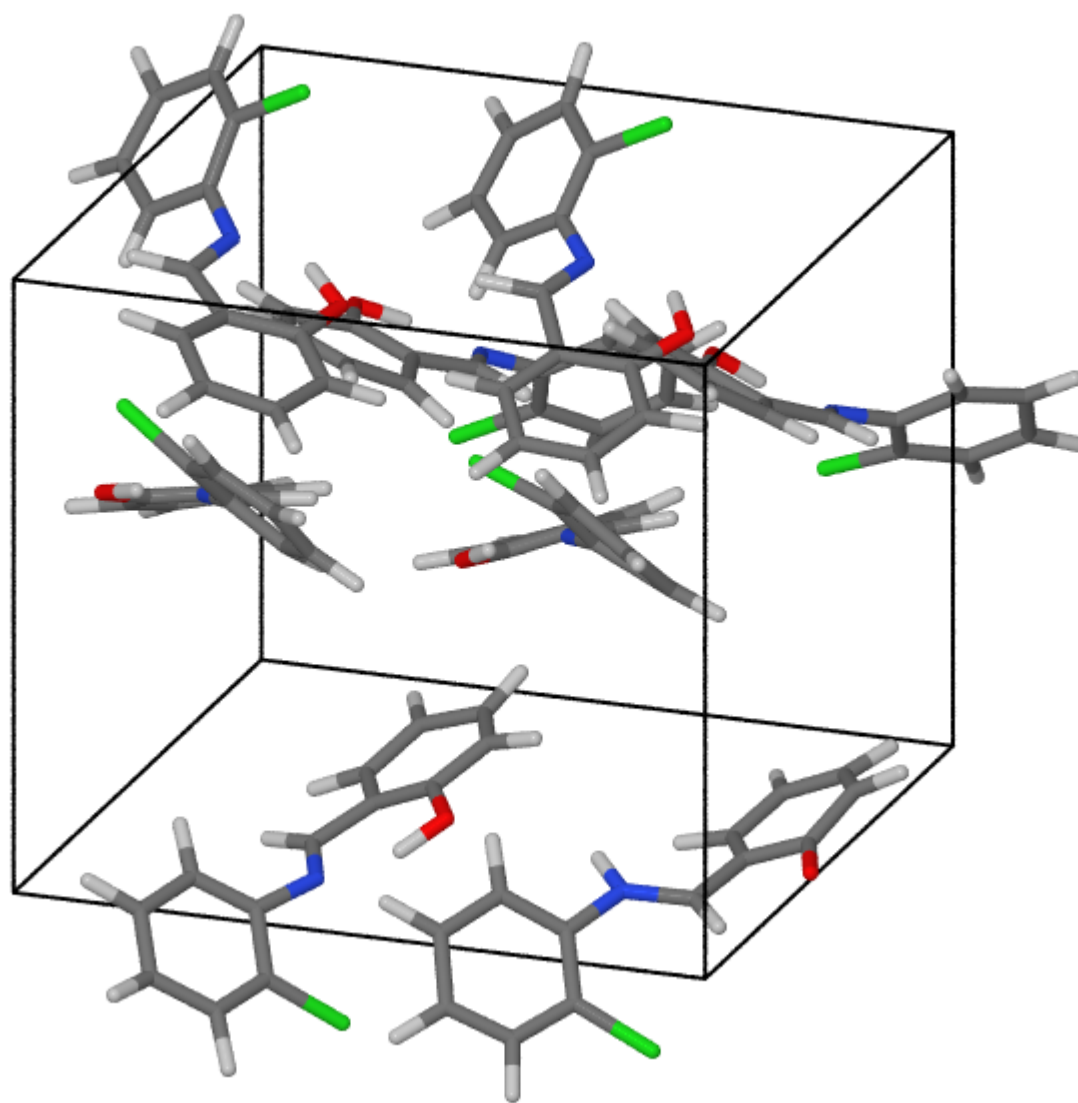

$$t = 480 \text{ fs} \quad E(S_1) - E(S_0) = 1.335 \text{ eV}$$

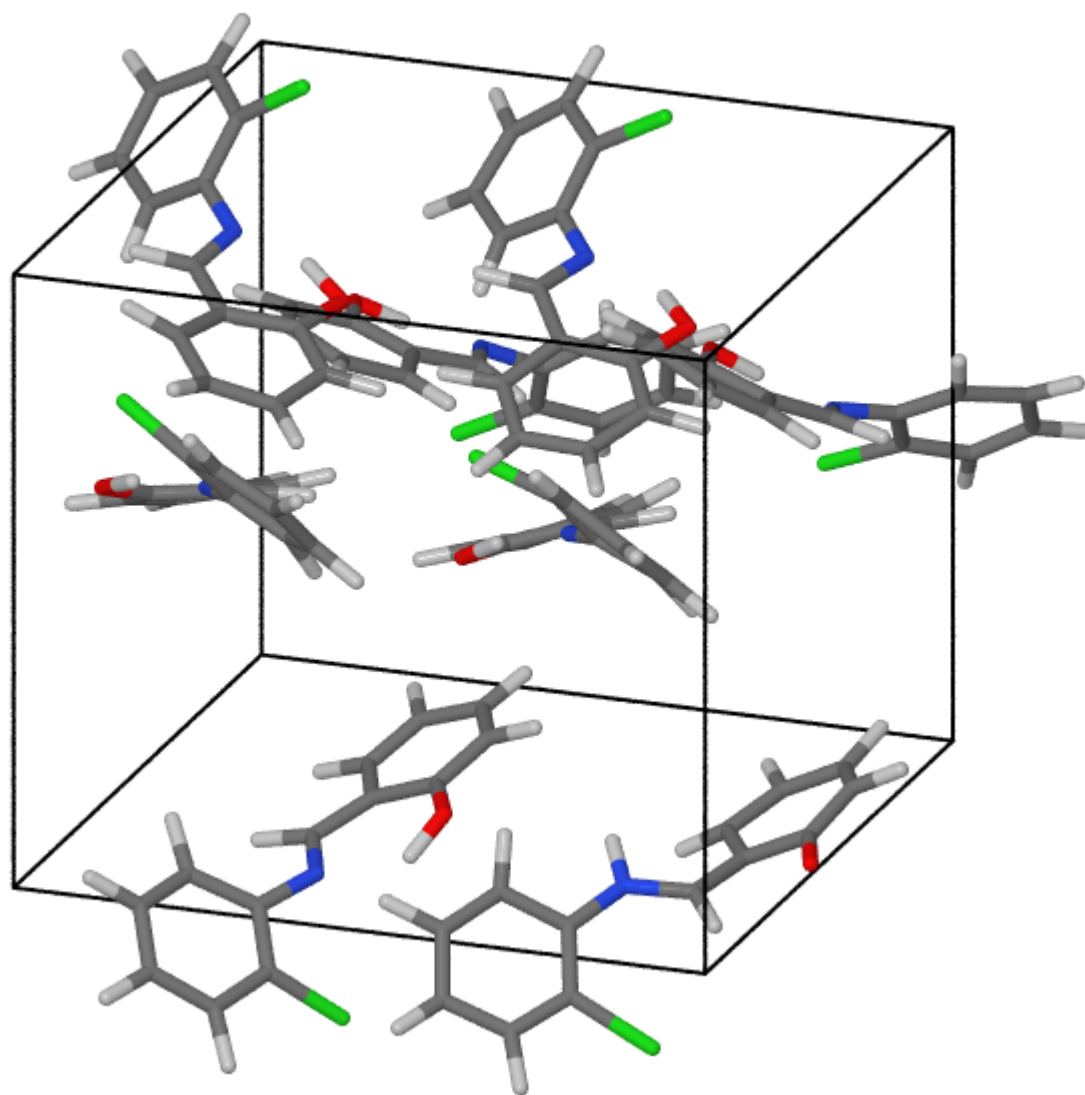

$$t = 490 \text{ fs} \quad E(S_1) - E(S_0) = 1.720 \text{ eV}$$

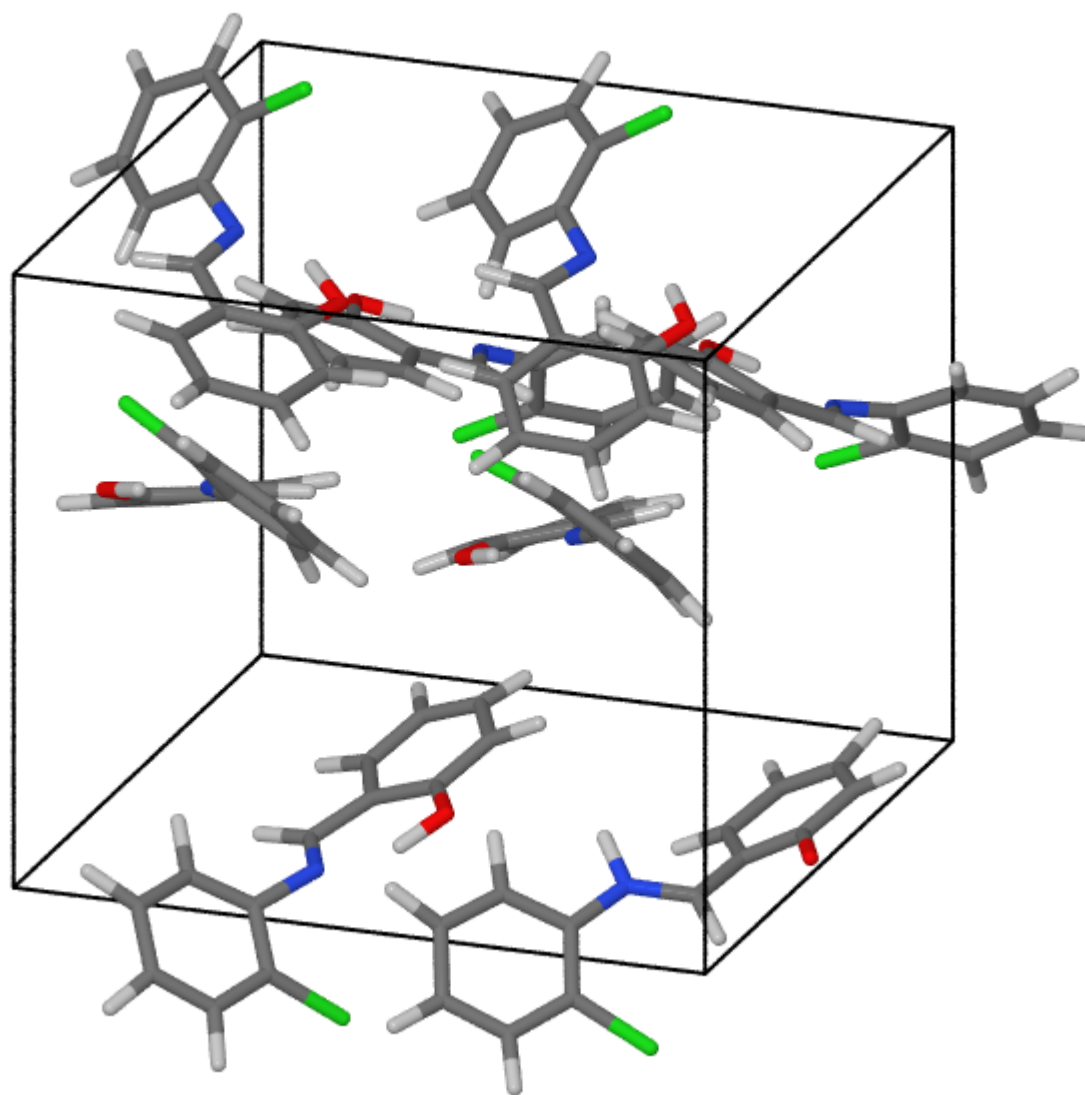



$$t = 500 \text{ fs} \quad E(S_1) - E(S_0) = 1.254 \text{ eV}$$

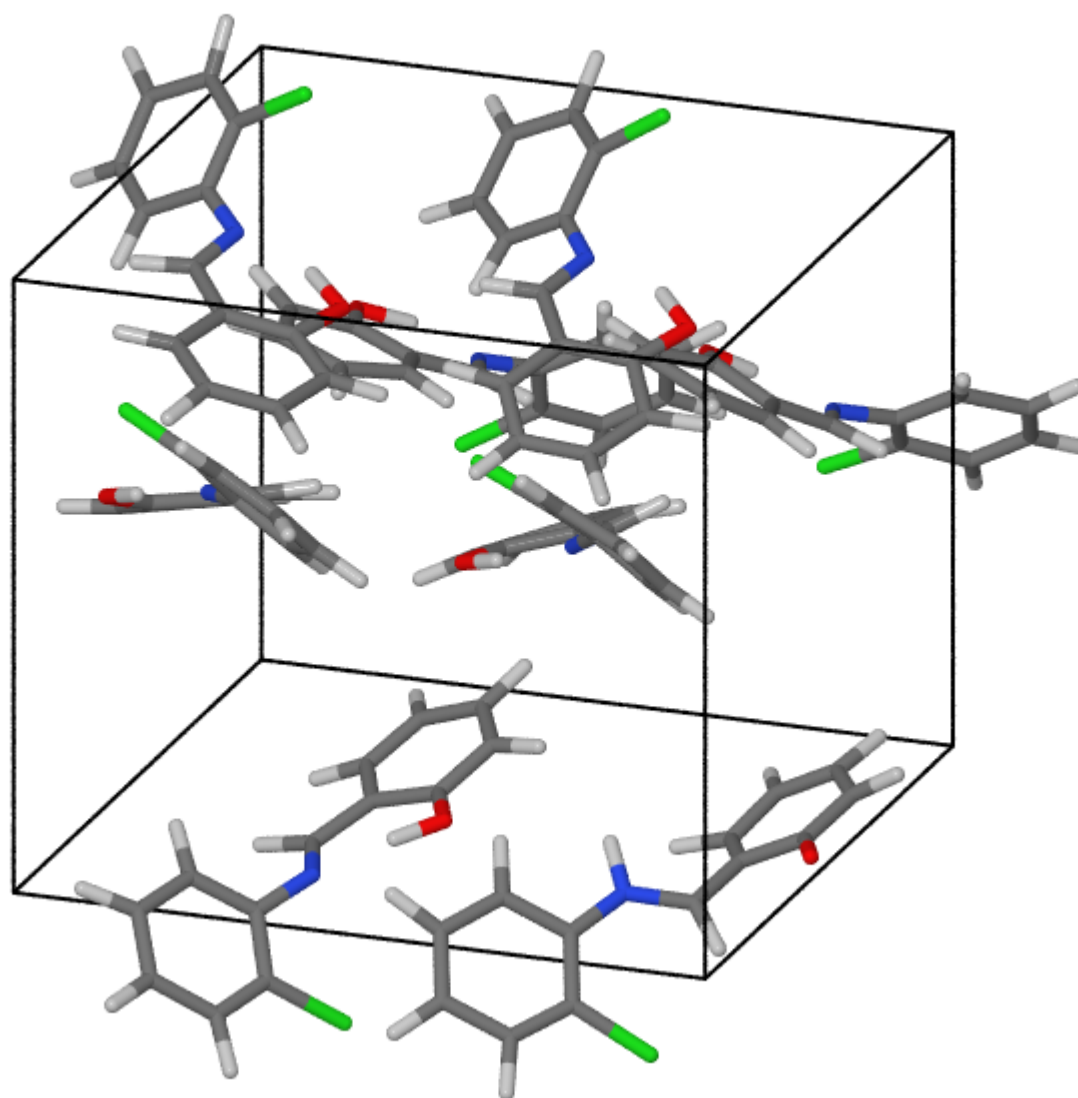

$$t = 510 \text{ fs} \quad E(S_1) - E(S_0) = 1.865 \text{ eV}$$

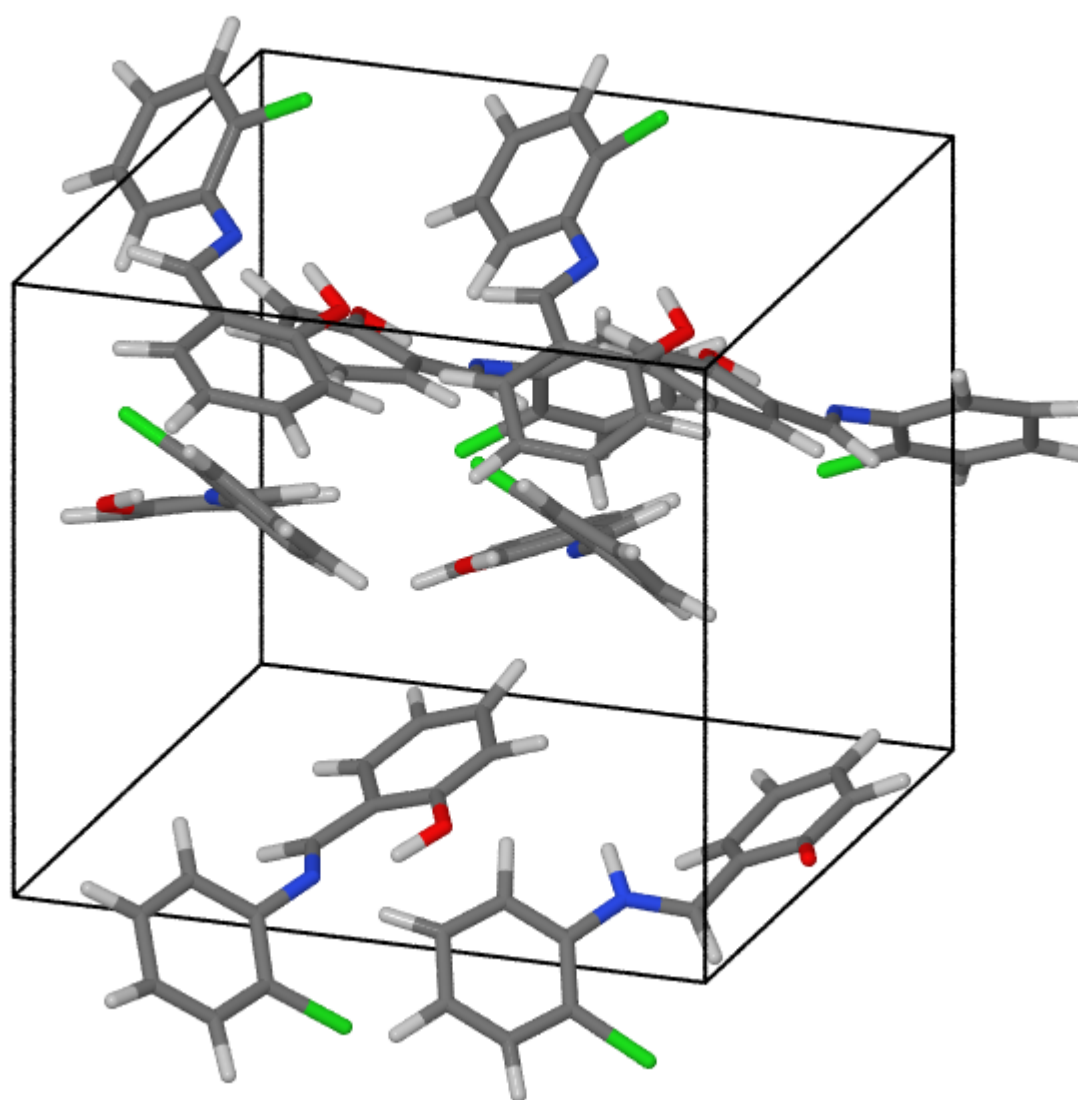

$$t = 520 \text{ fs} \quad E(S_1) - E(S_0) = 1.437 \text{ eV}$$

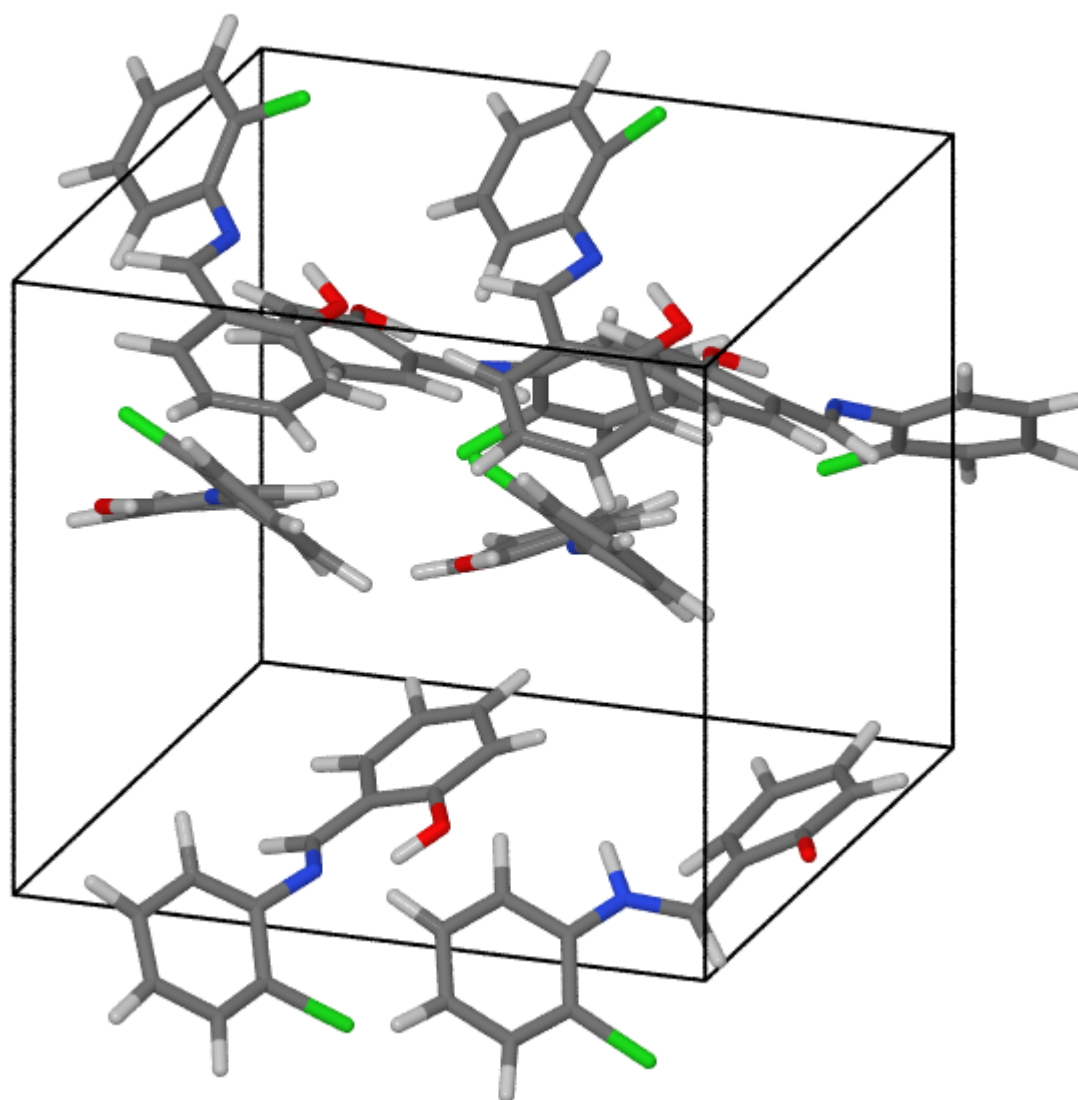

$$t = 530 \text{ fs} \quad E(S_1) - E(S_0) = 1.388 \text{ eV}$$

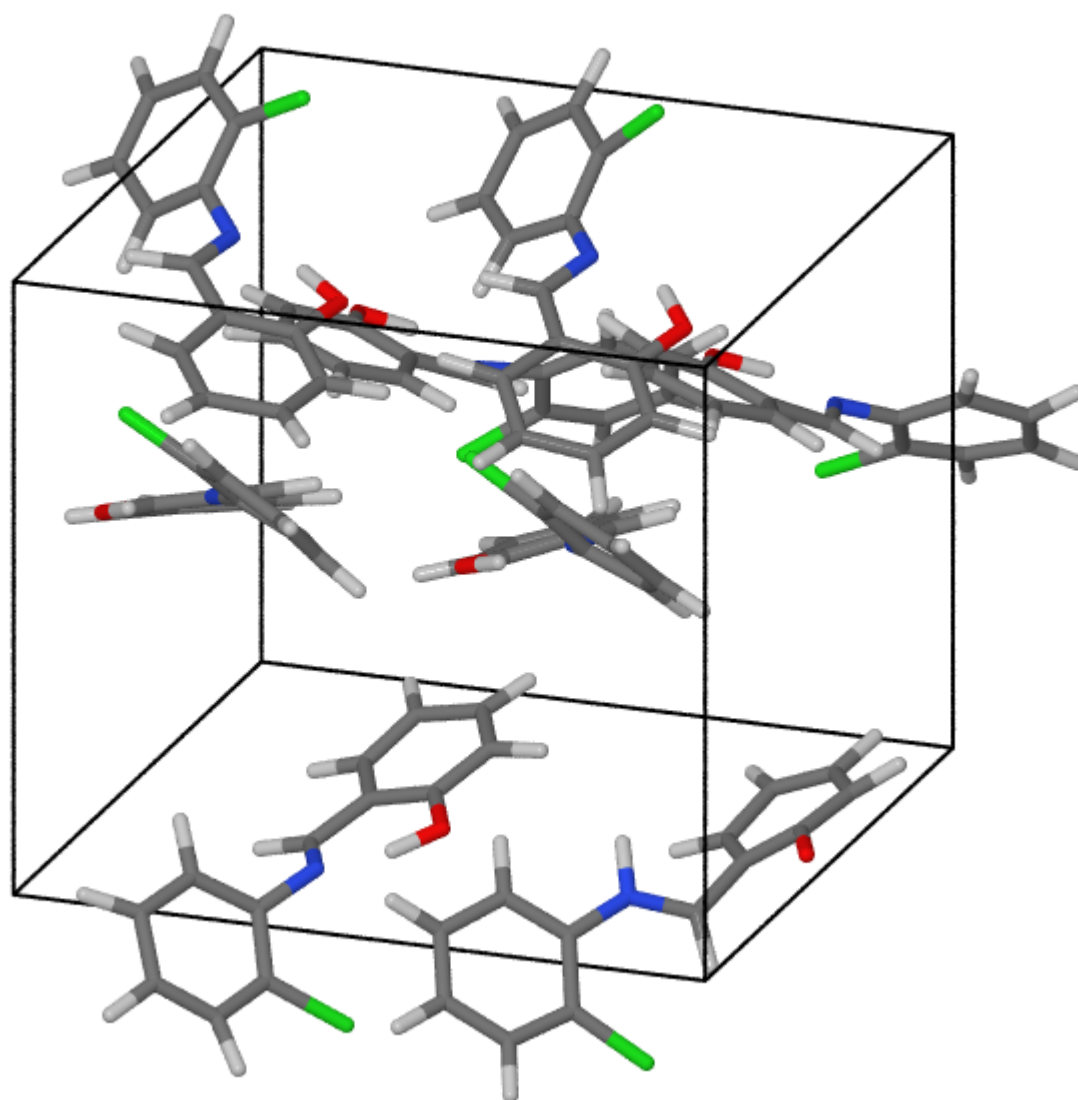

$$t = 540 \text{ fs} \quad E(S_1) - E(S_0) = 1.060 \text{ eV}$$

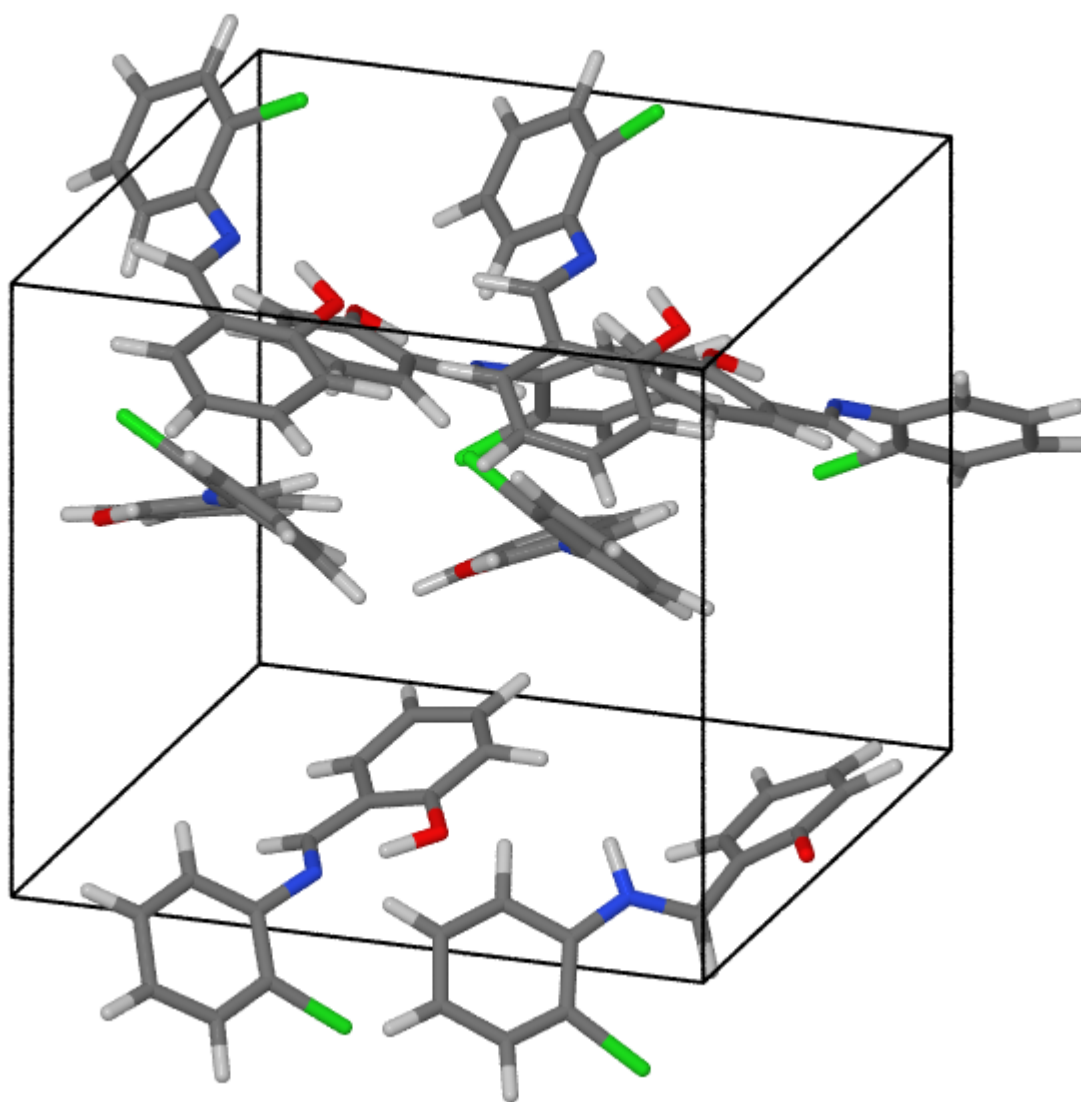

$$t = 550 \text{ fs} \quad E(S_1) - E(S_0) = 0.927 \text{ eV}$$

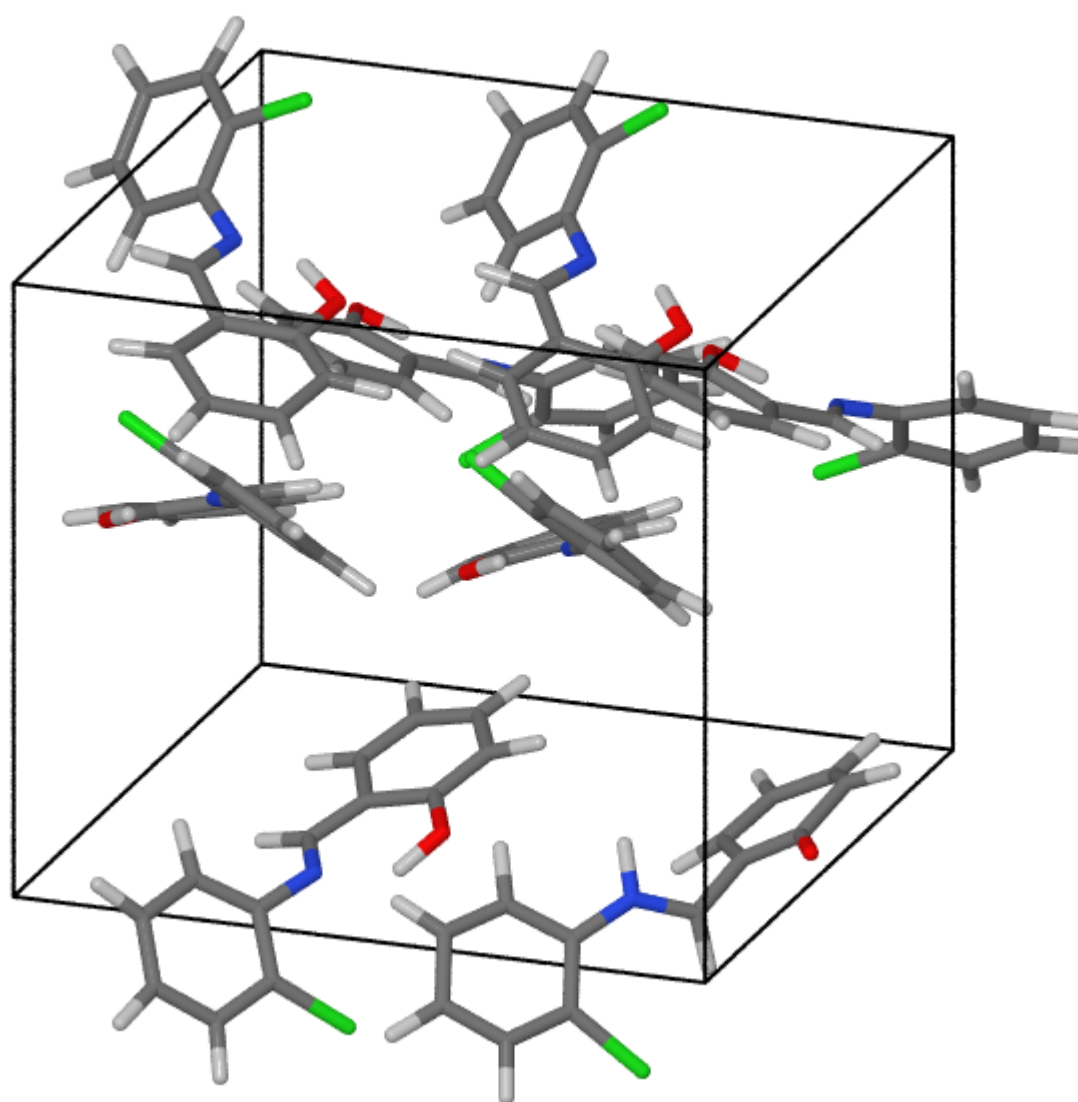

$$t = 560 \text{ fs} \quad E(S_1) - E(S_0) = 0.691 \text{ eV}$$

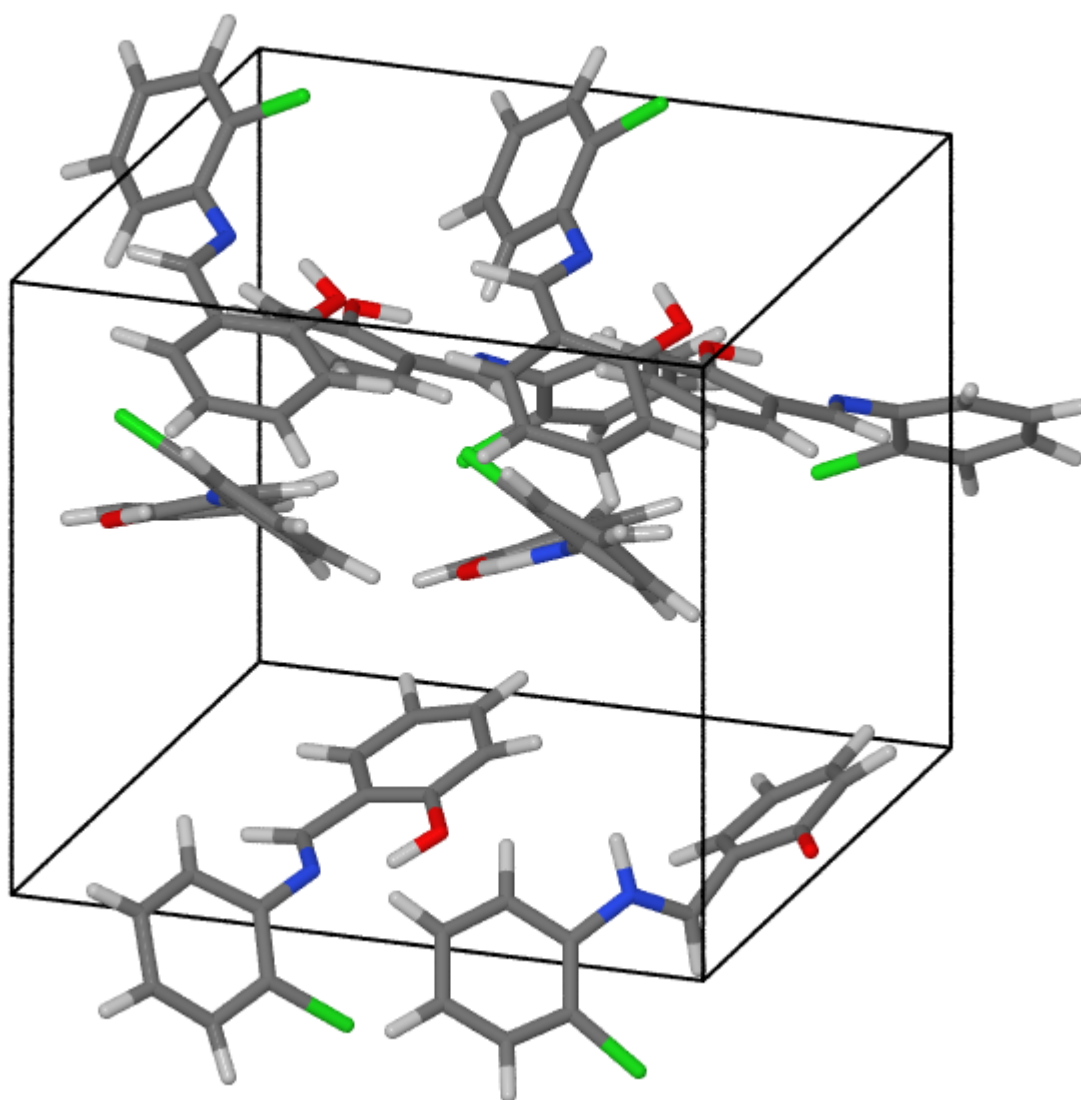

$$t = 570 \text{ fs} \quad E(S_1) - E(S_0) = 0.310 \text{ eV}$$

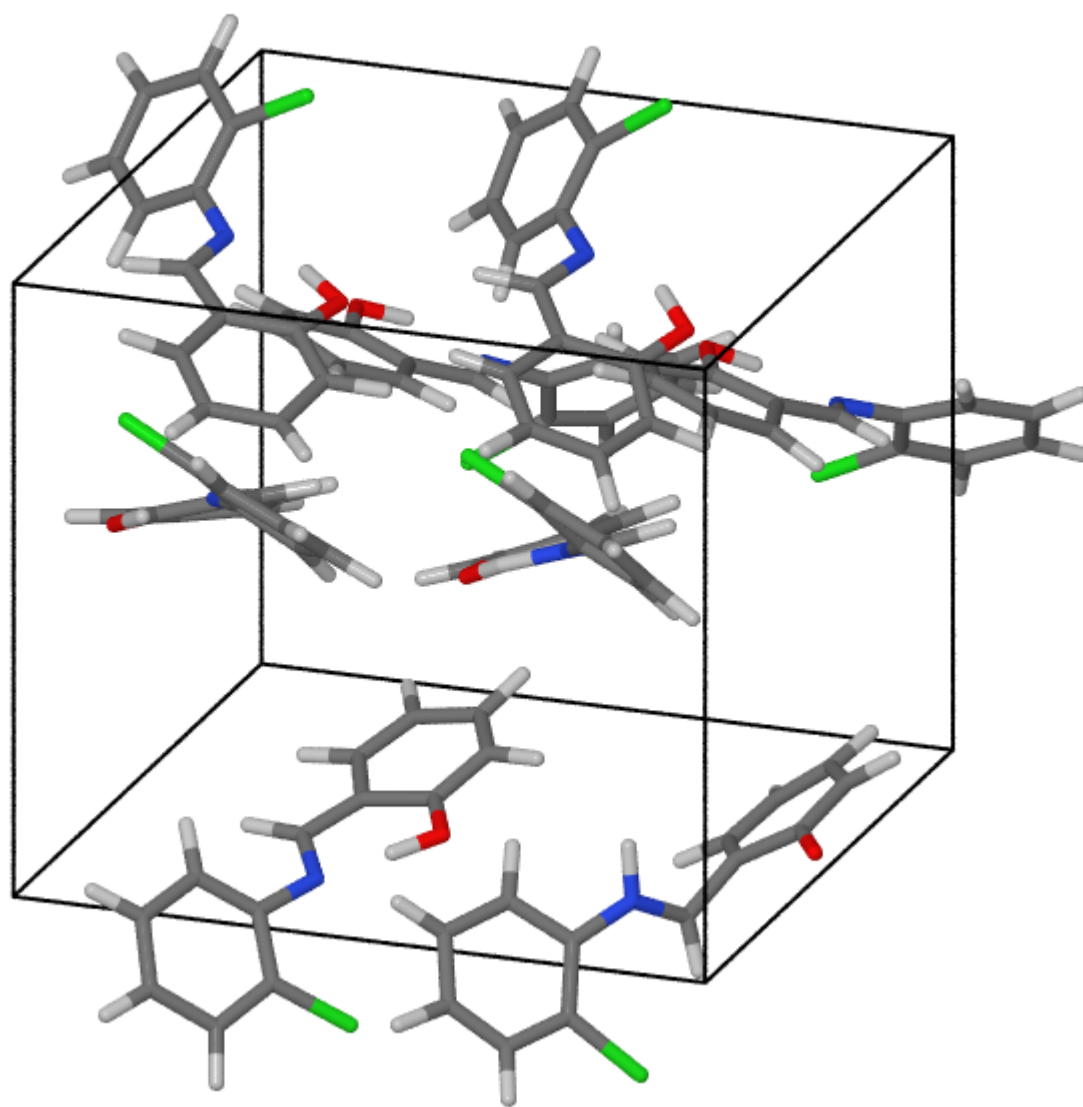



$$t = 580 \text{ fs} \quad E(S_1) - E(S_0) = 0.509 \text{ eV}$$

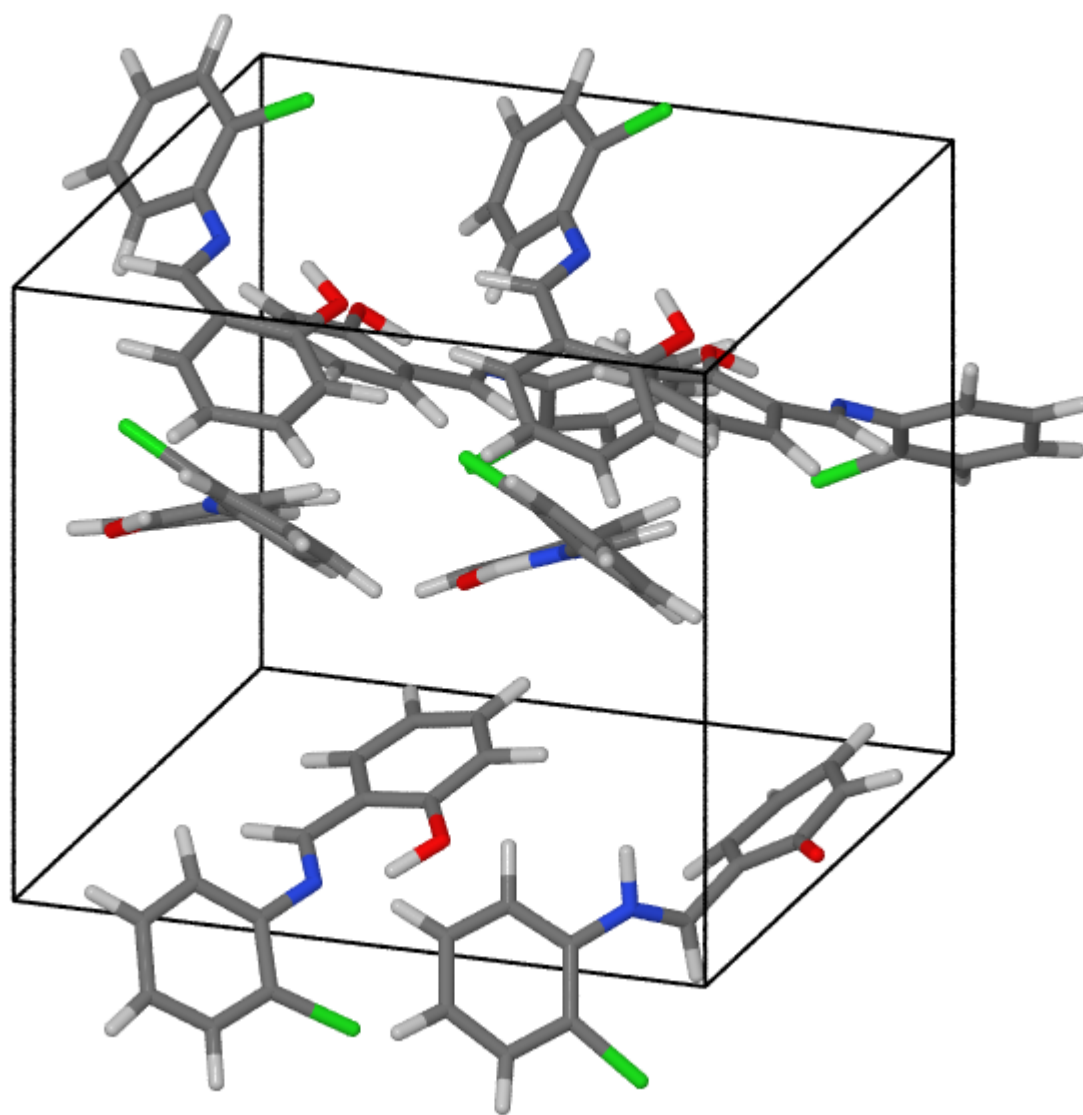

$$t = 590 \text{ fs} \quad E(S_1) - E(S_0) = 0.253 \text{ eV}$$

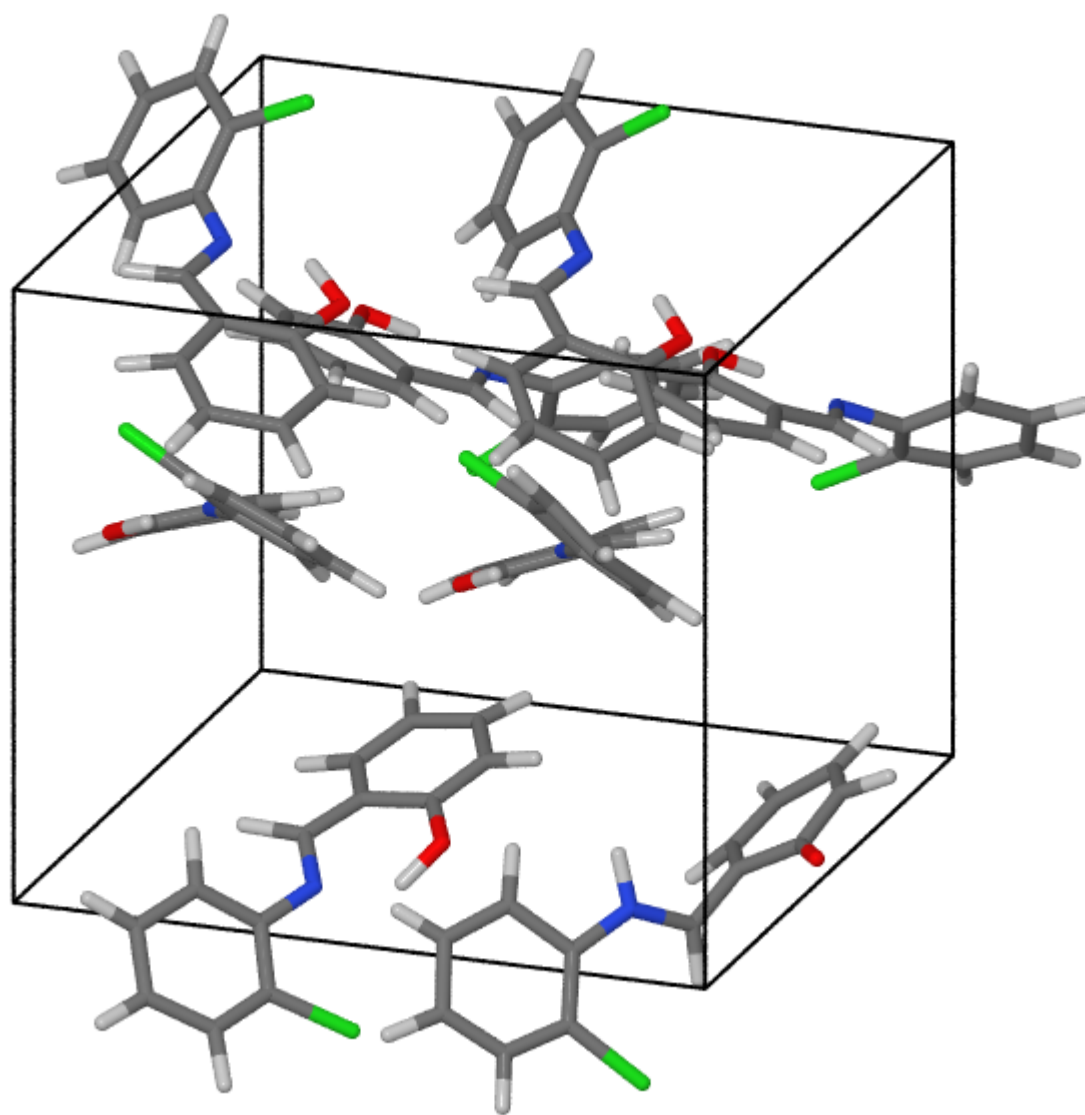

Supplement: c3cp51263k.pdf [file c3cp51263k.pdf]
